# Supplementary material for: Gut Microbiota in Military International Travelers with Doxycycline Malaria Prophylaxis: Towards the Risk of a Simpson Paradox in the Human Microbiome Field
Source: Pathogens. 2021 Aug 21;10(8):1063. doi: 10.3390/pathogens10081063 (PMC8400693; doi:10.3390/pathogens10081063)
Supplement: Supplementary file 1 [file pathogens-10-01063-s001.zip]

Archive with 20 entries (20 files):
- Suppl Fig S1 coverage.pdf
- Suppl Fig S10 alphaD Diarrhea yes no_before.pdf
- Suppl Fig S11 alphaD Diarrhea yes no_after.pdf
- Suppl Fig S12 PCOA BC diarrhée yes no B and A.pdf
- Suppl Fig S13 alpha D smoking.pdf
- Suppl Fig S14 PCOA BC smoker.pdf
- Suppl Fig S15 Alpha Sexe.pdf
- Suppl Fig S16 PCOA BC sex.pdf
- Suppl Fig S17 Alpha BMIClasss.pdf
- Suppl Fig S18 PCOA BC BMI class.pdf
- Suppl Fig S2 absolu abundance PHYLA doxy yes no B A.pdf
- Suppl Fig S3 absolute adundance ORDER doxy yes no B A.pdf
- Suppl Fig S4 Firmicutes TOP 15_genus_doxy1.pdf
- Suppl Fig S5 Bacteroidetes TOP 15_genus_doxy1.pdf
- Suppl Fig S6 Proteobacteria TOP 15_genus_doxy1.pdf
- Suppl Fig S7 4 HM Abondancedoxy2.pdf
- Suppl Fig S8a Lactobacillus abundance per sample B A and probiotics satuts.pdf
- Suppl Fig S8b Lactobacillus abundance per sample of probiotic groups B and A.pdf
- Suppl Fig S9 a Bifidobacterium abundance per sample B A and probiotics satuts.pdf
- Suppl Fig S9 b Rplot Bifidobacterium abundance per sample of probiotic groups B and A.pdf
