# Supplementary figures and images for: Gut Microbiota in Military International Travelers with Doxycycline Malaria Prophylaxis: Towards the Risk of a Simpson Paradox in the Human Microbiome Field
Source: MDPI journal article supplement (doi:10.3390/pathogens10081063), 2021-08-21

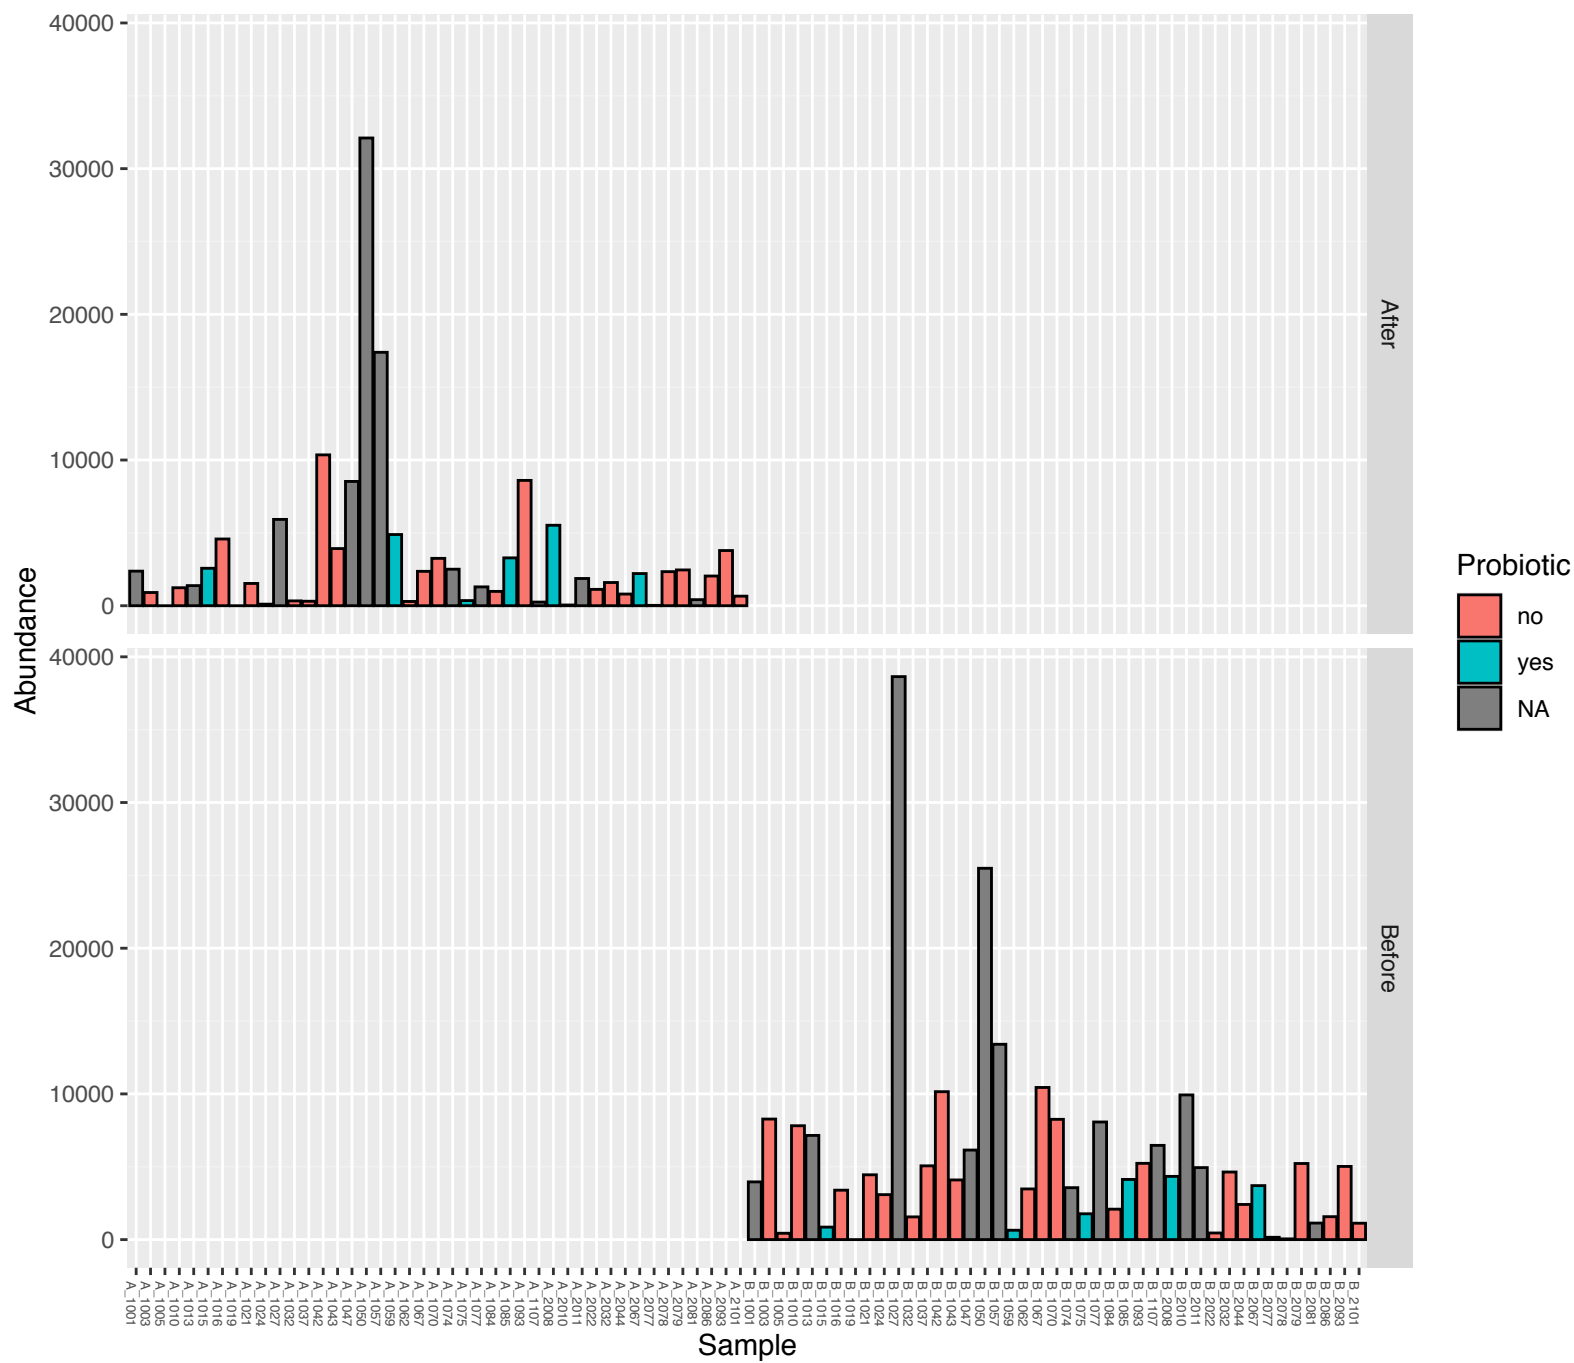

Supplement: s1 [file s1]

OTU

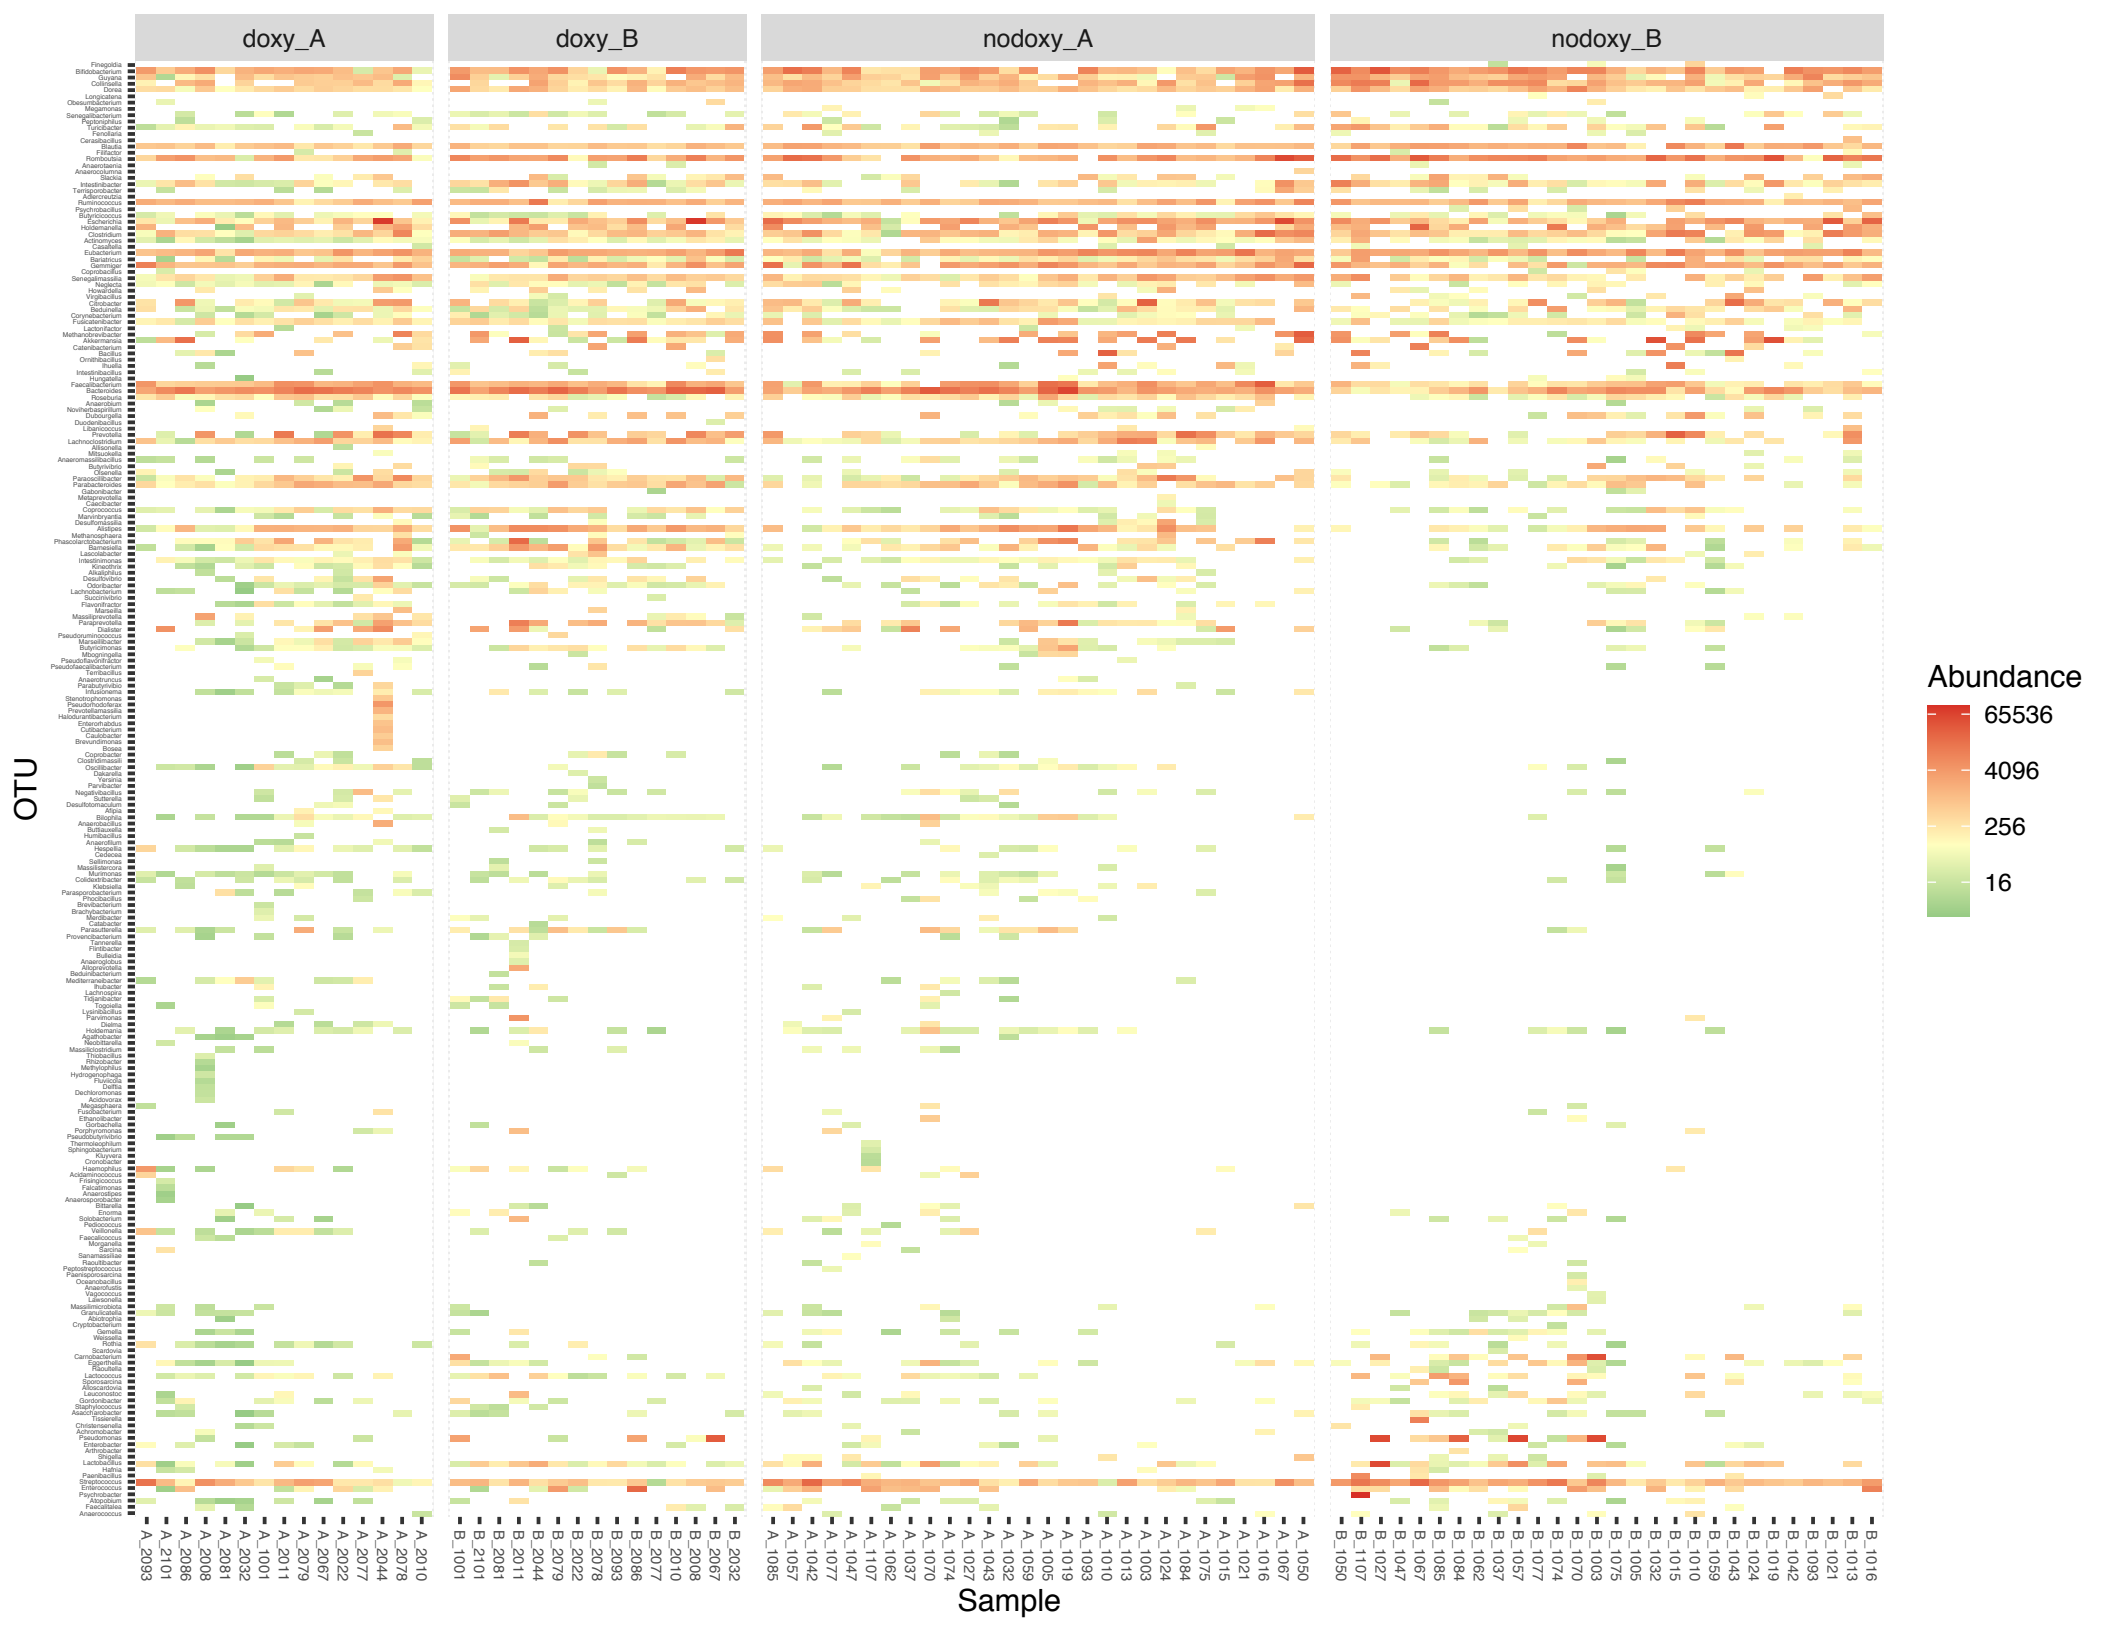

Supplement: s1 [file s1]

Figure 2 : PCoA of Bray-Curtis distance

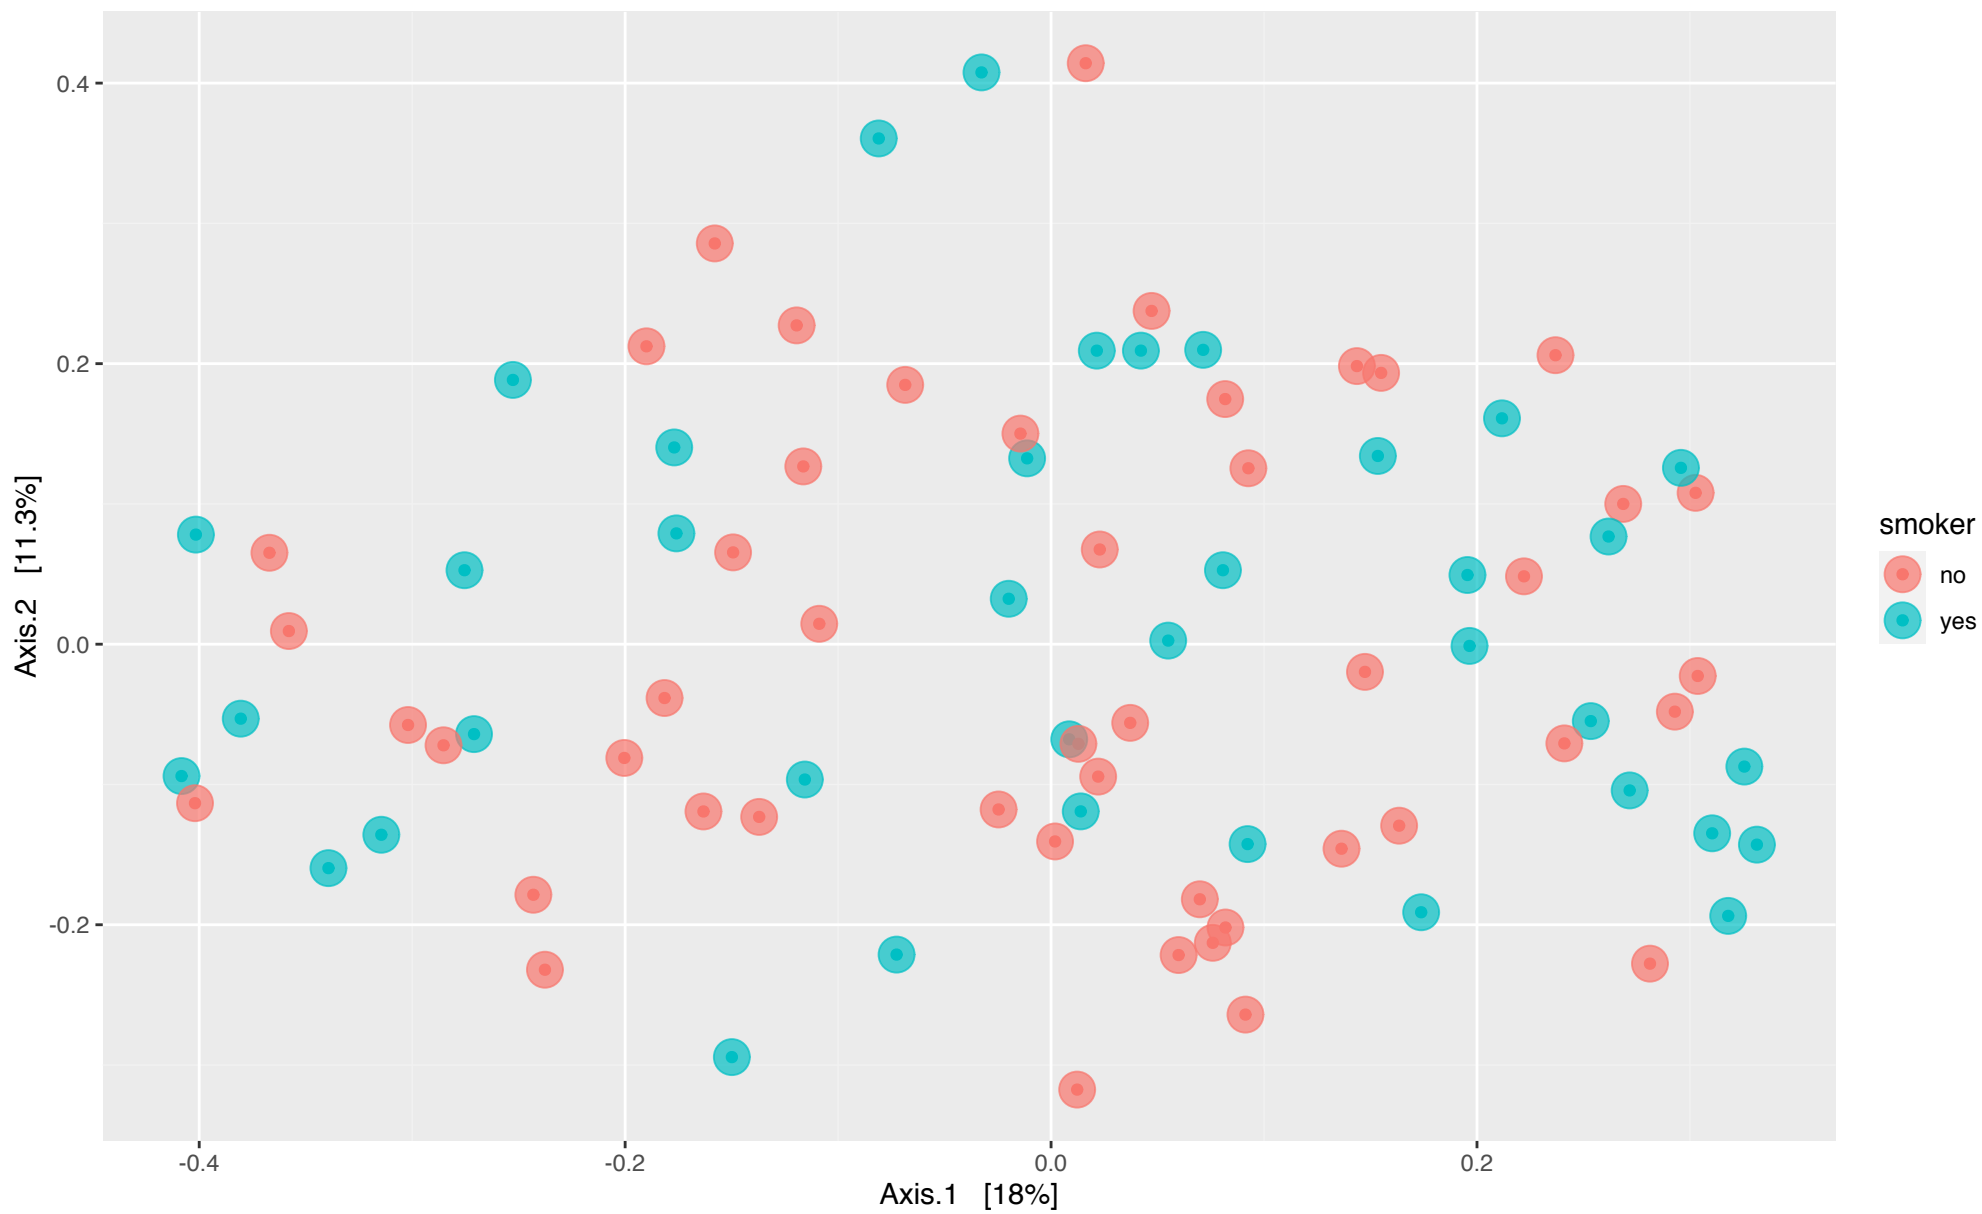

Supplement: s1 [file s1]

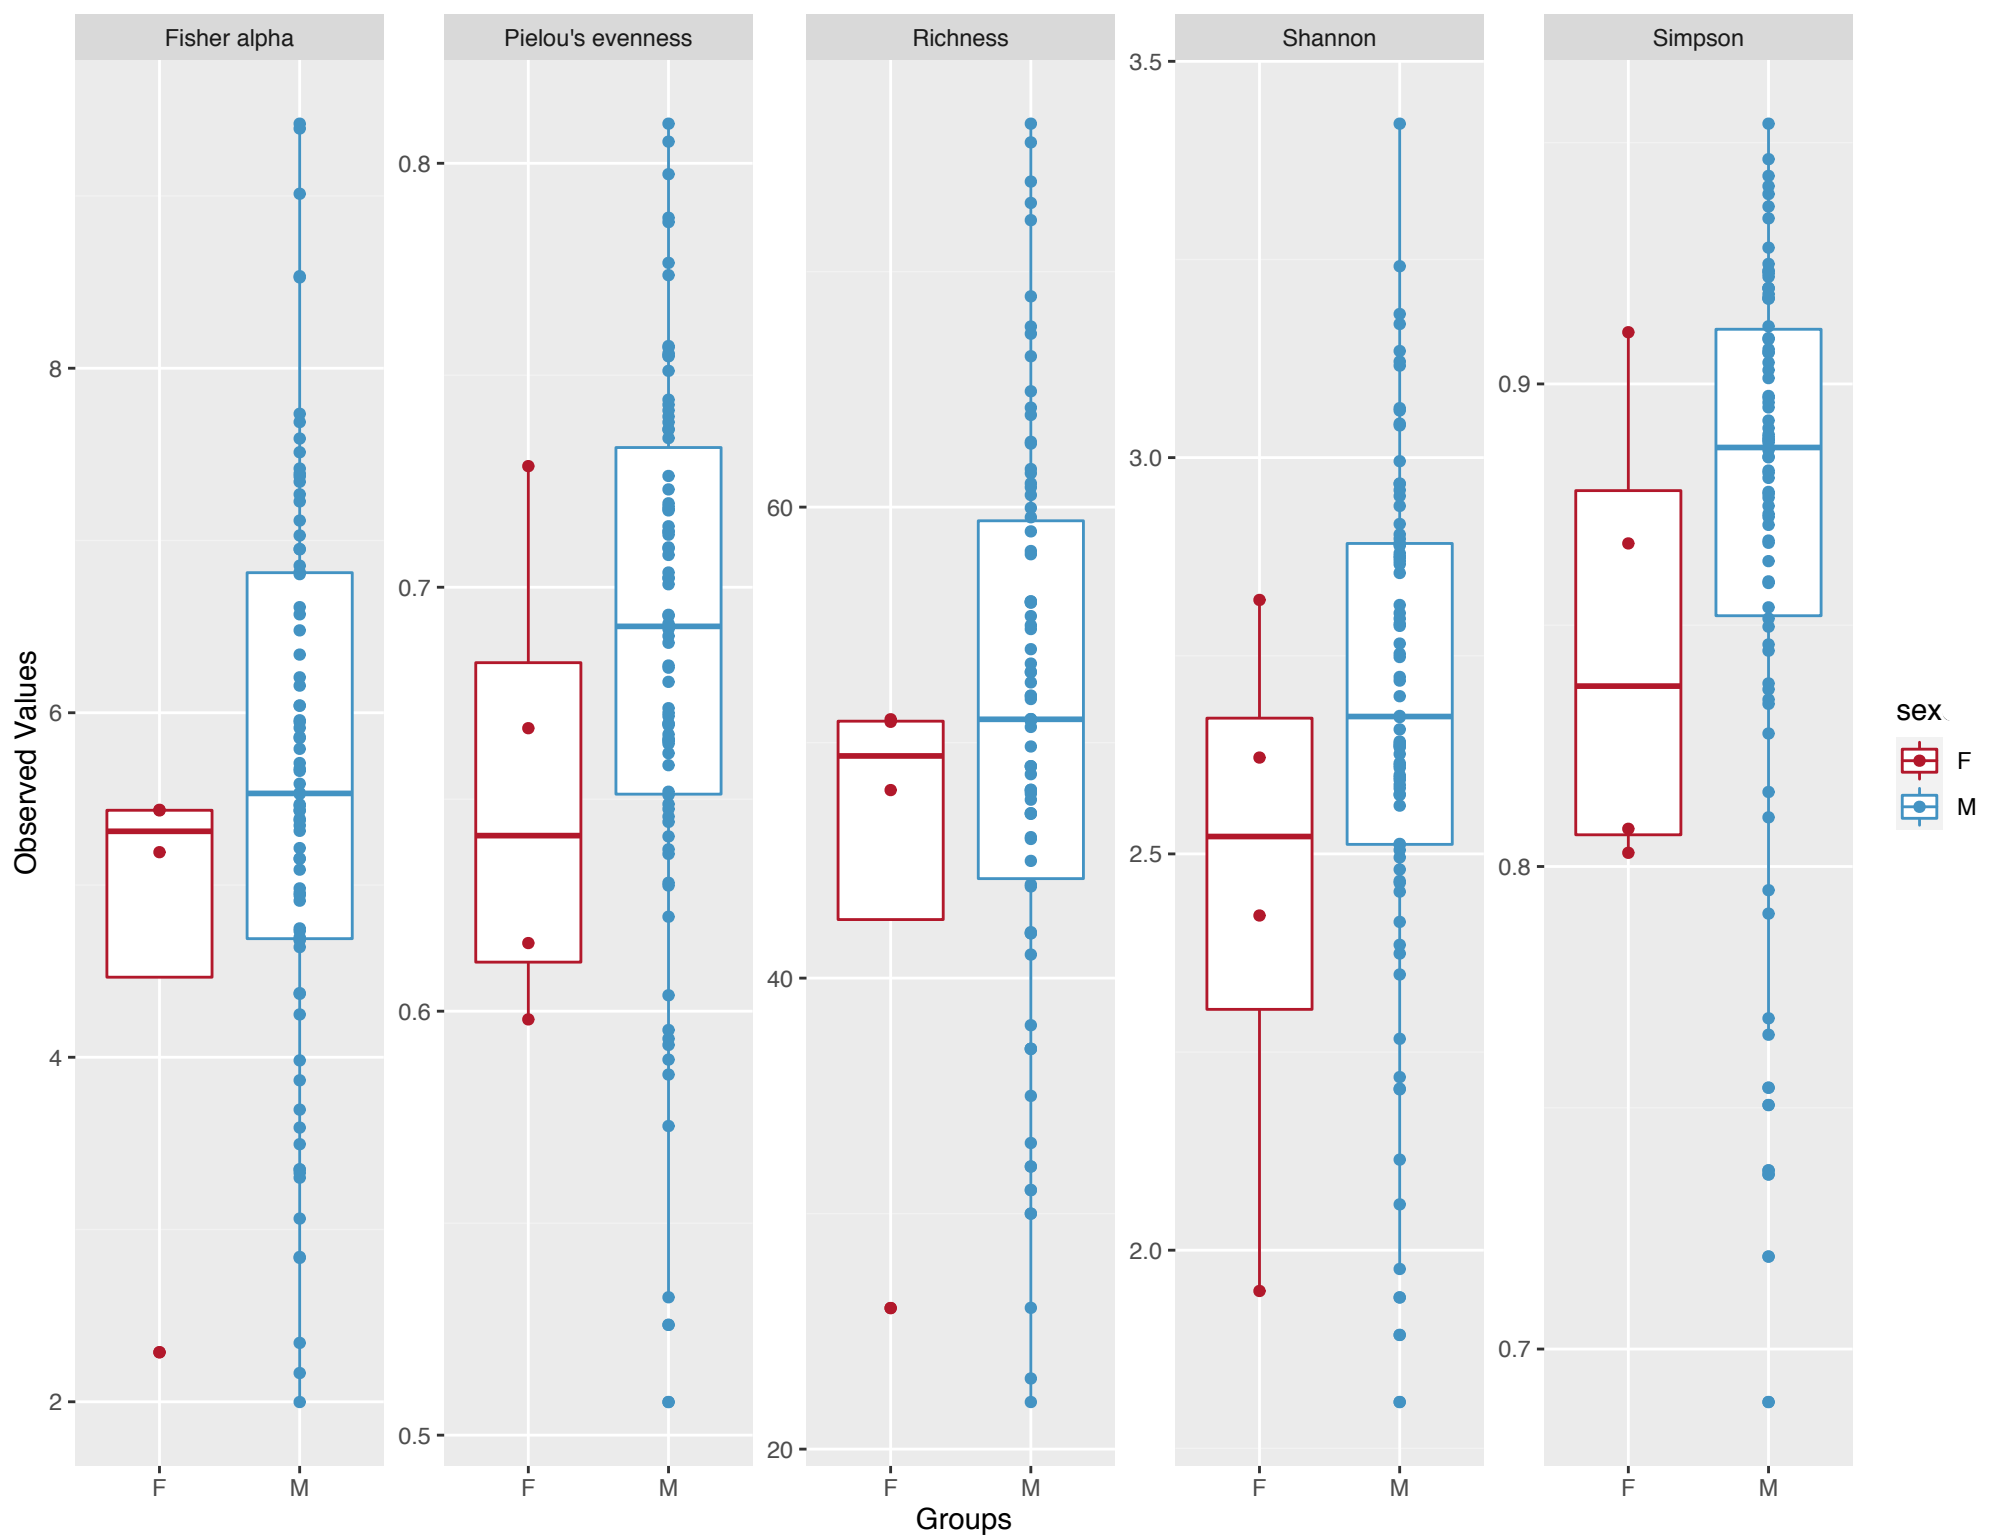

Supplement: s1 [file s1]

Composition within Firmicutes ( 15 top Genus )

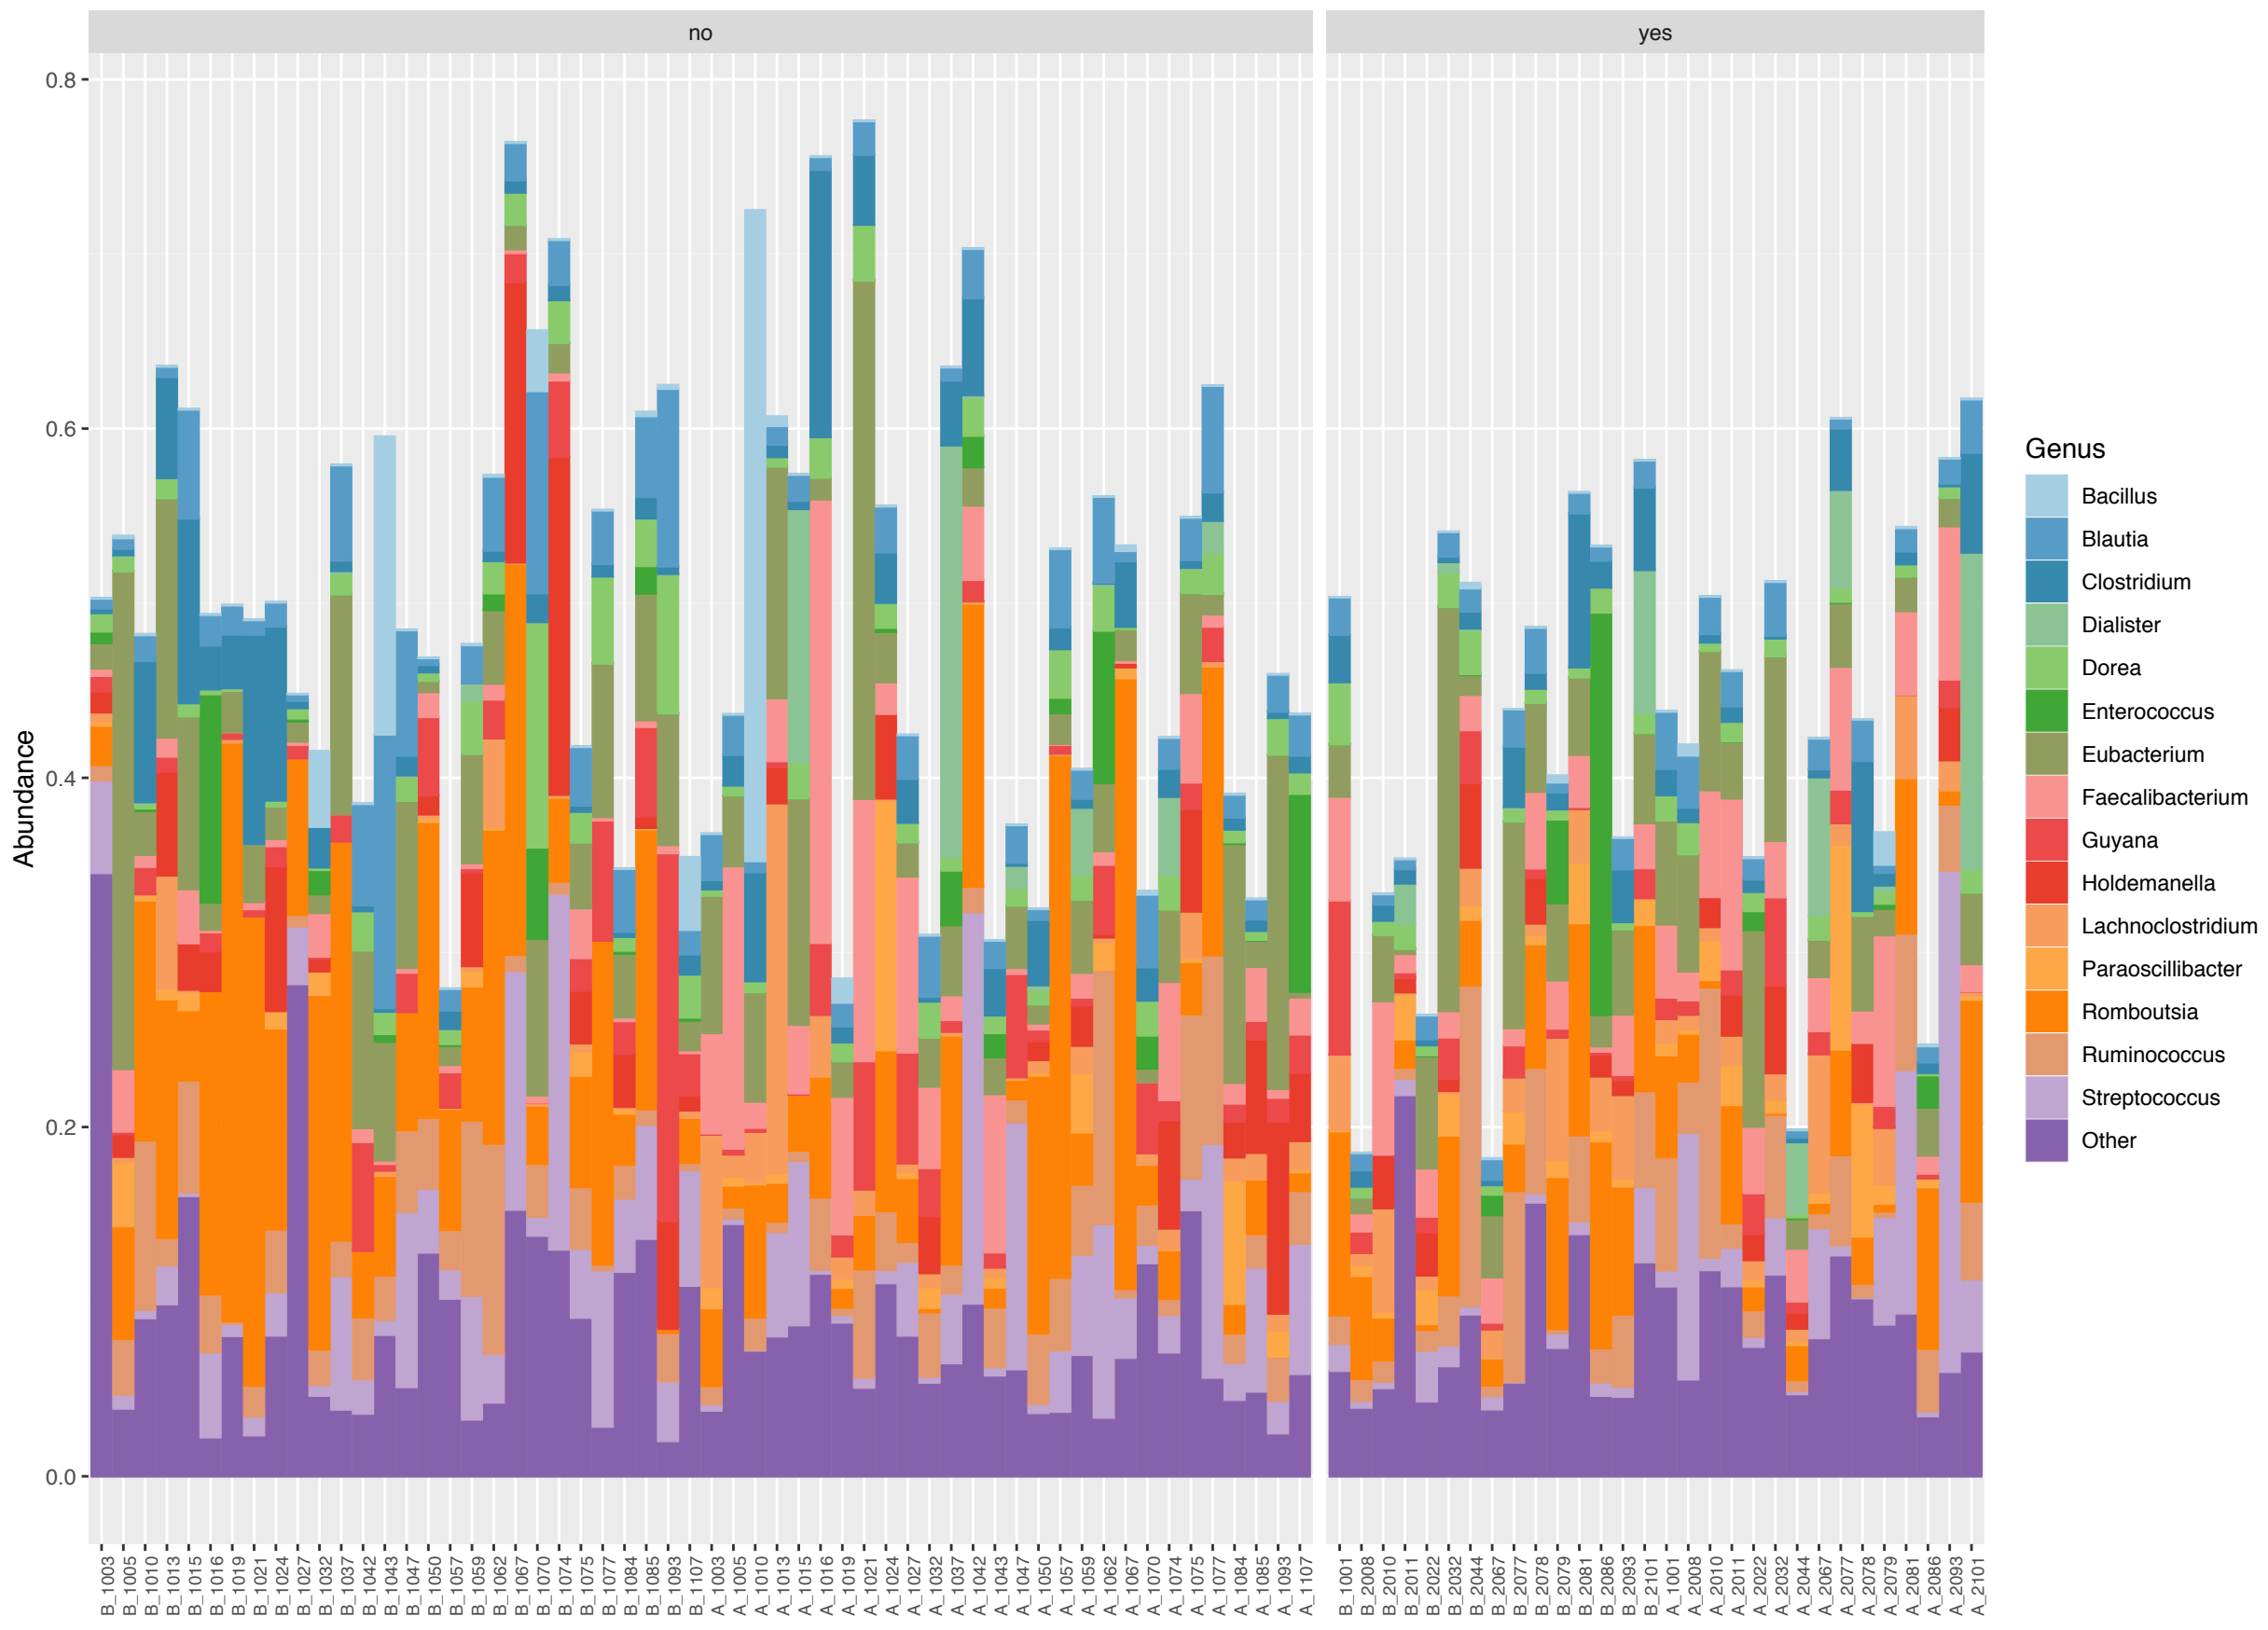

Supplement: s1 [file s1]

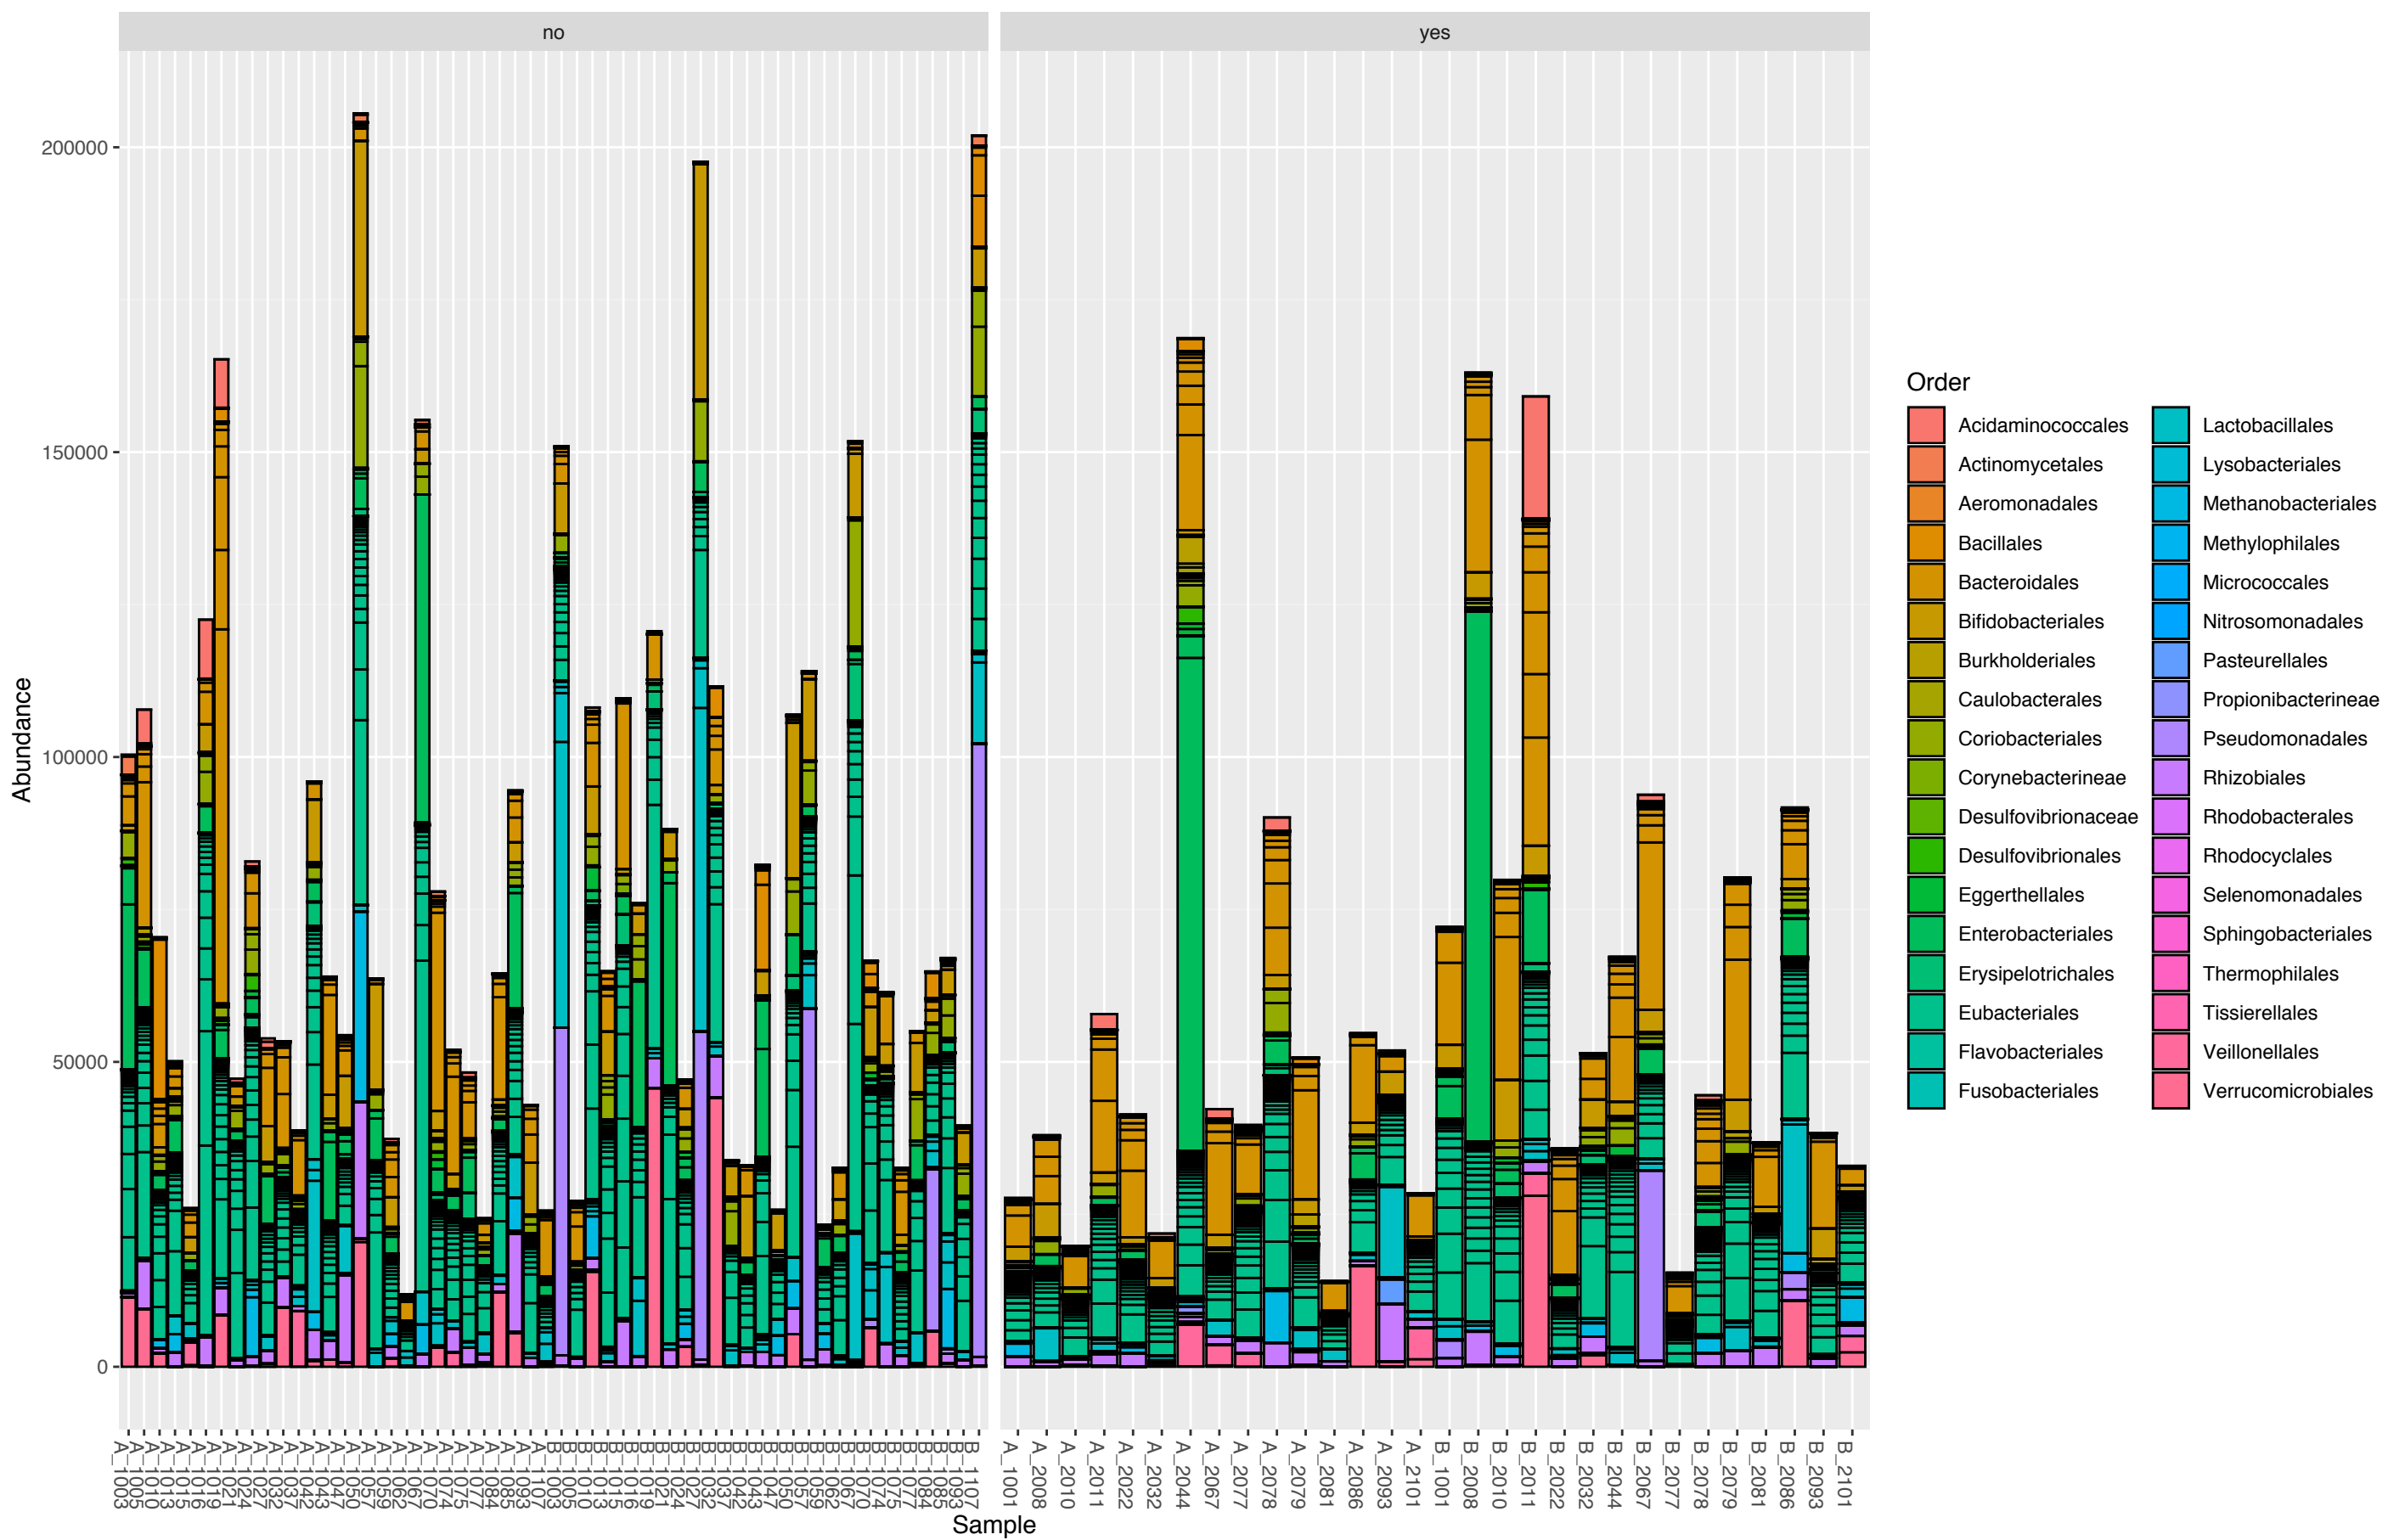

Supplement: s1 [file s1]

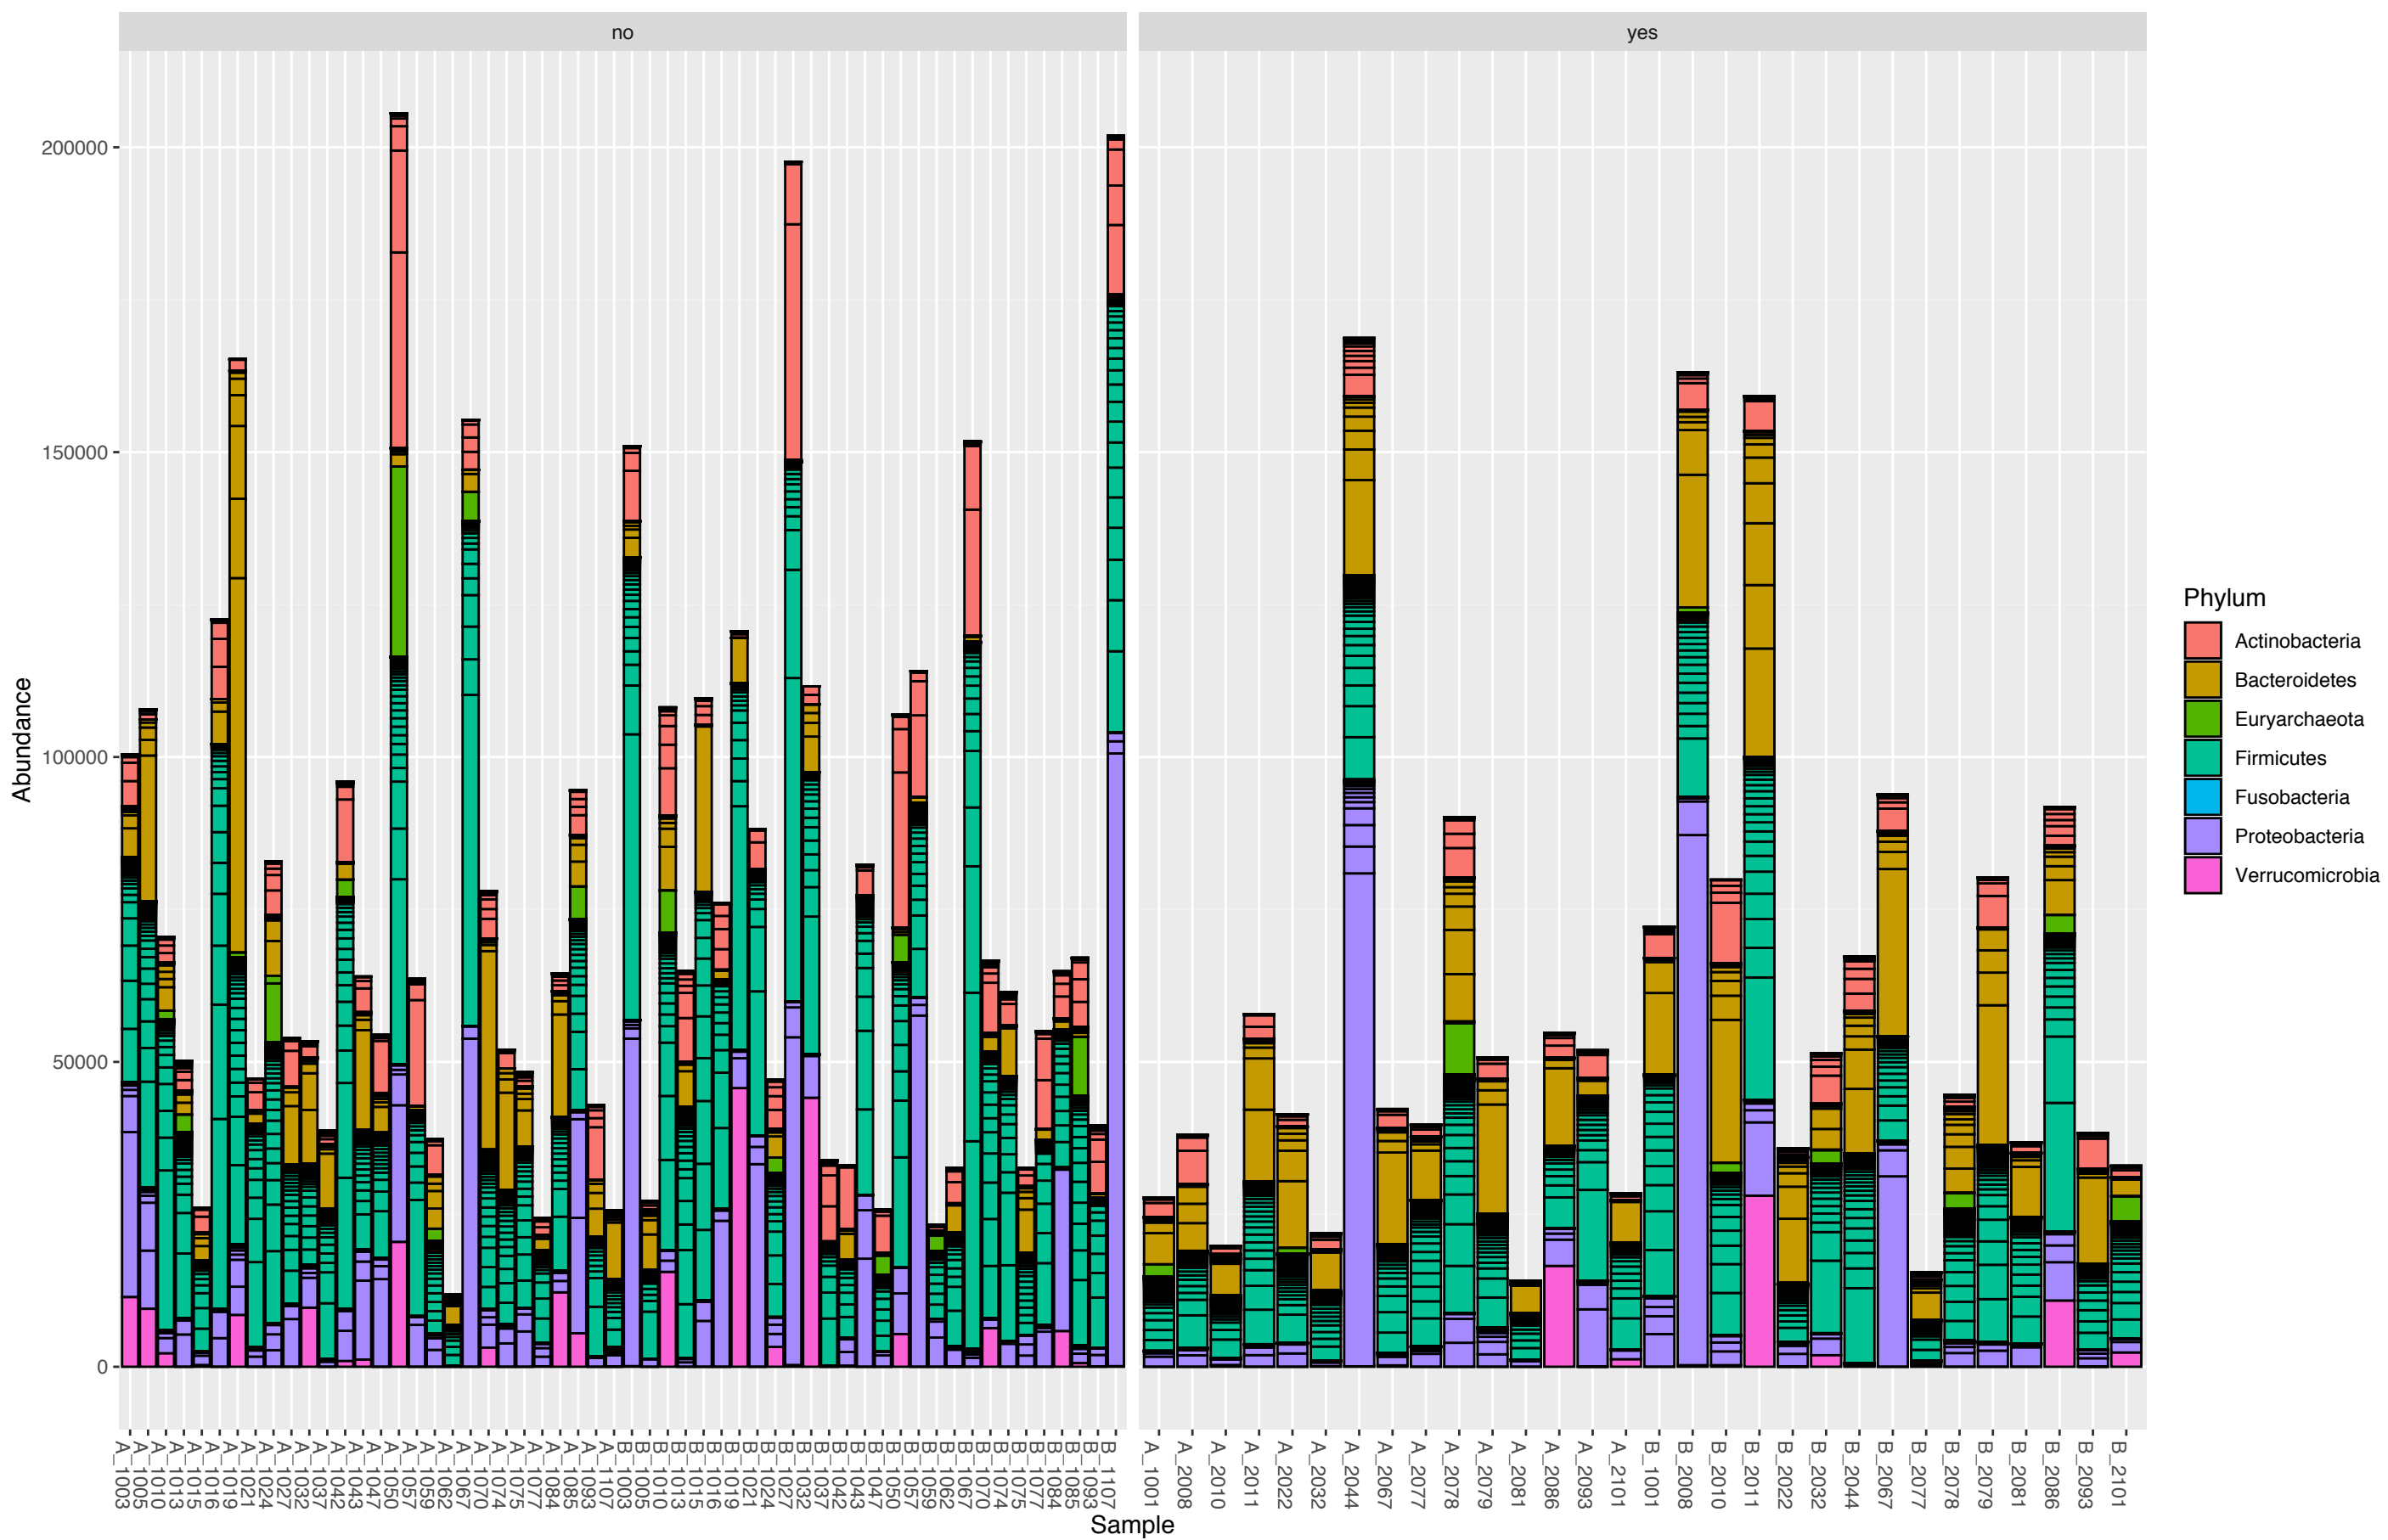

Supplement: s1 [file s1]

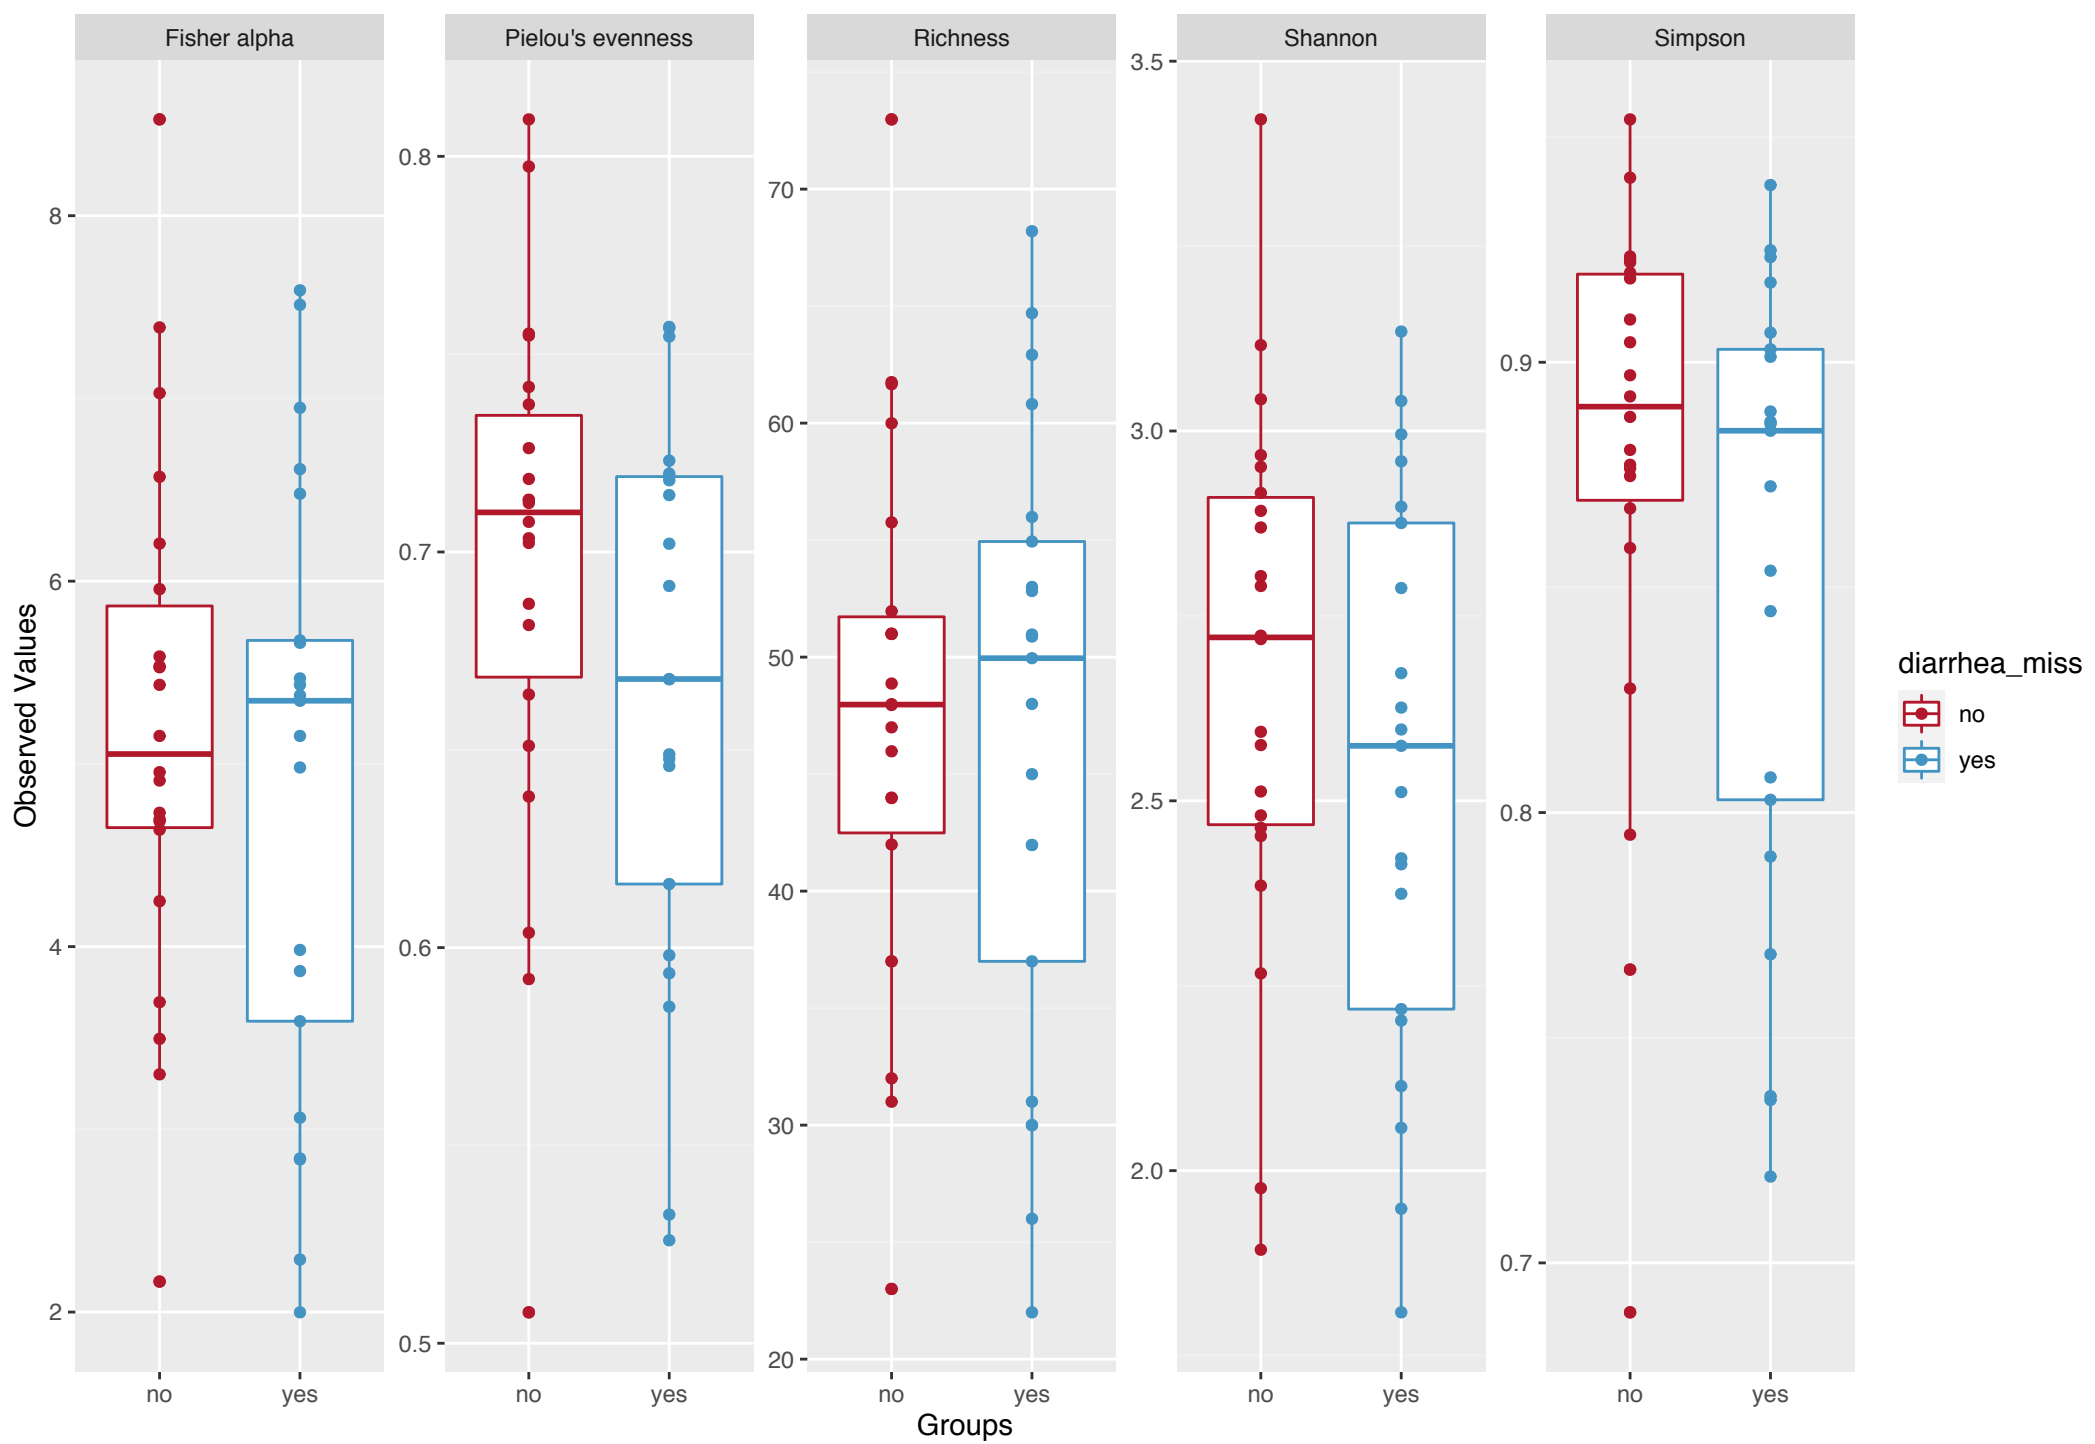

Supplement: s1 [file s1]

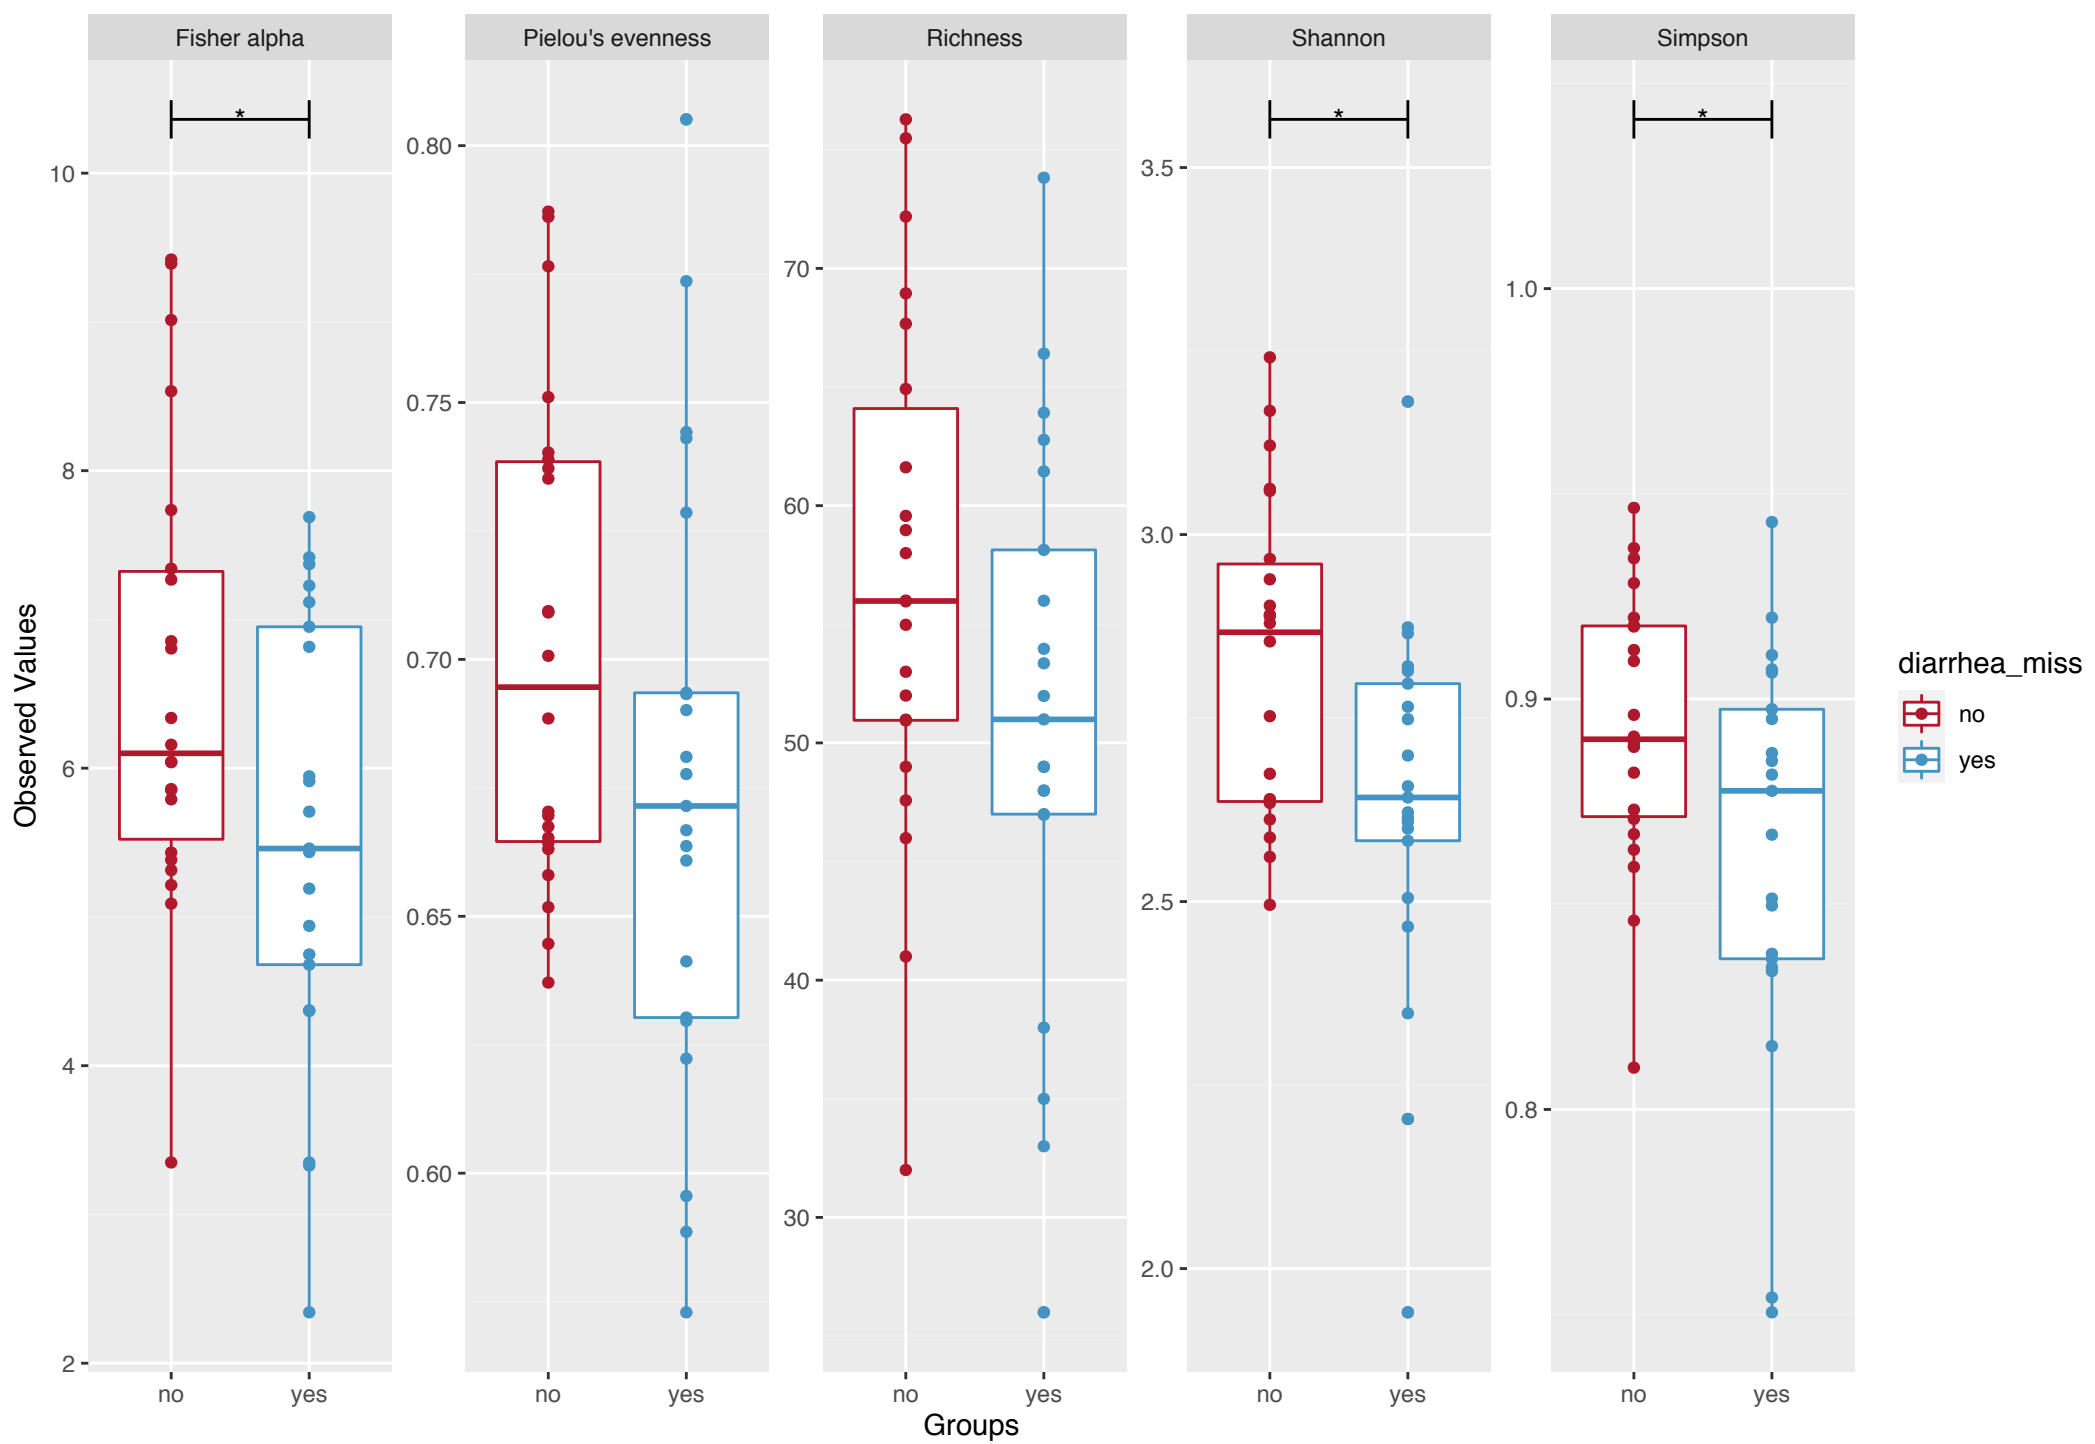

Supplement: s1 [file s1]

Figure 2 : PCoA of Bray-Curtis distance

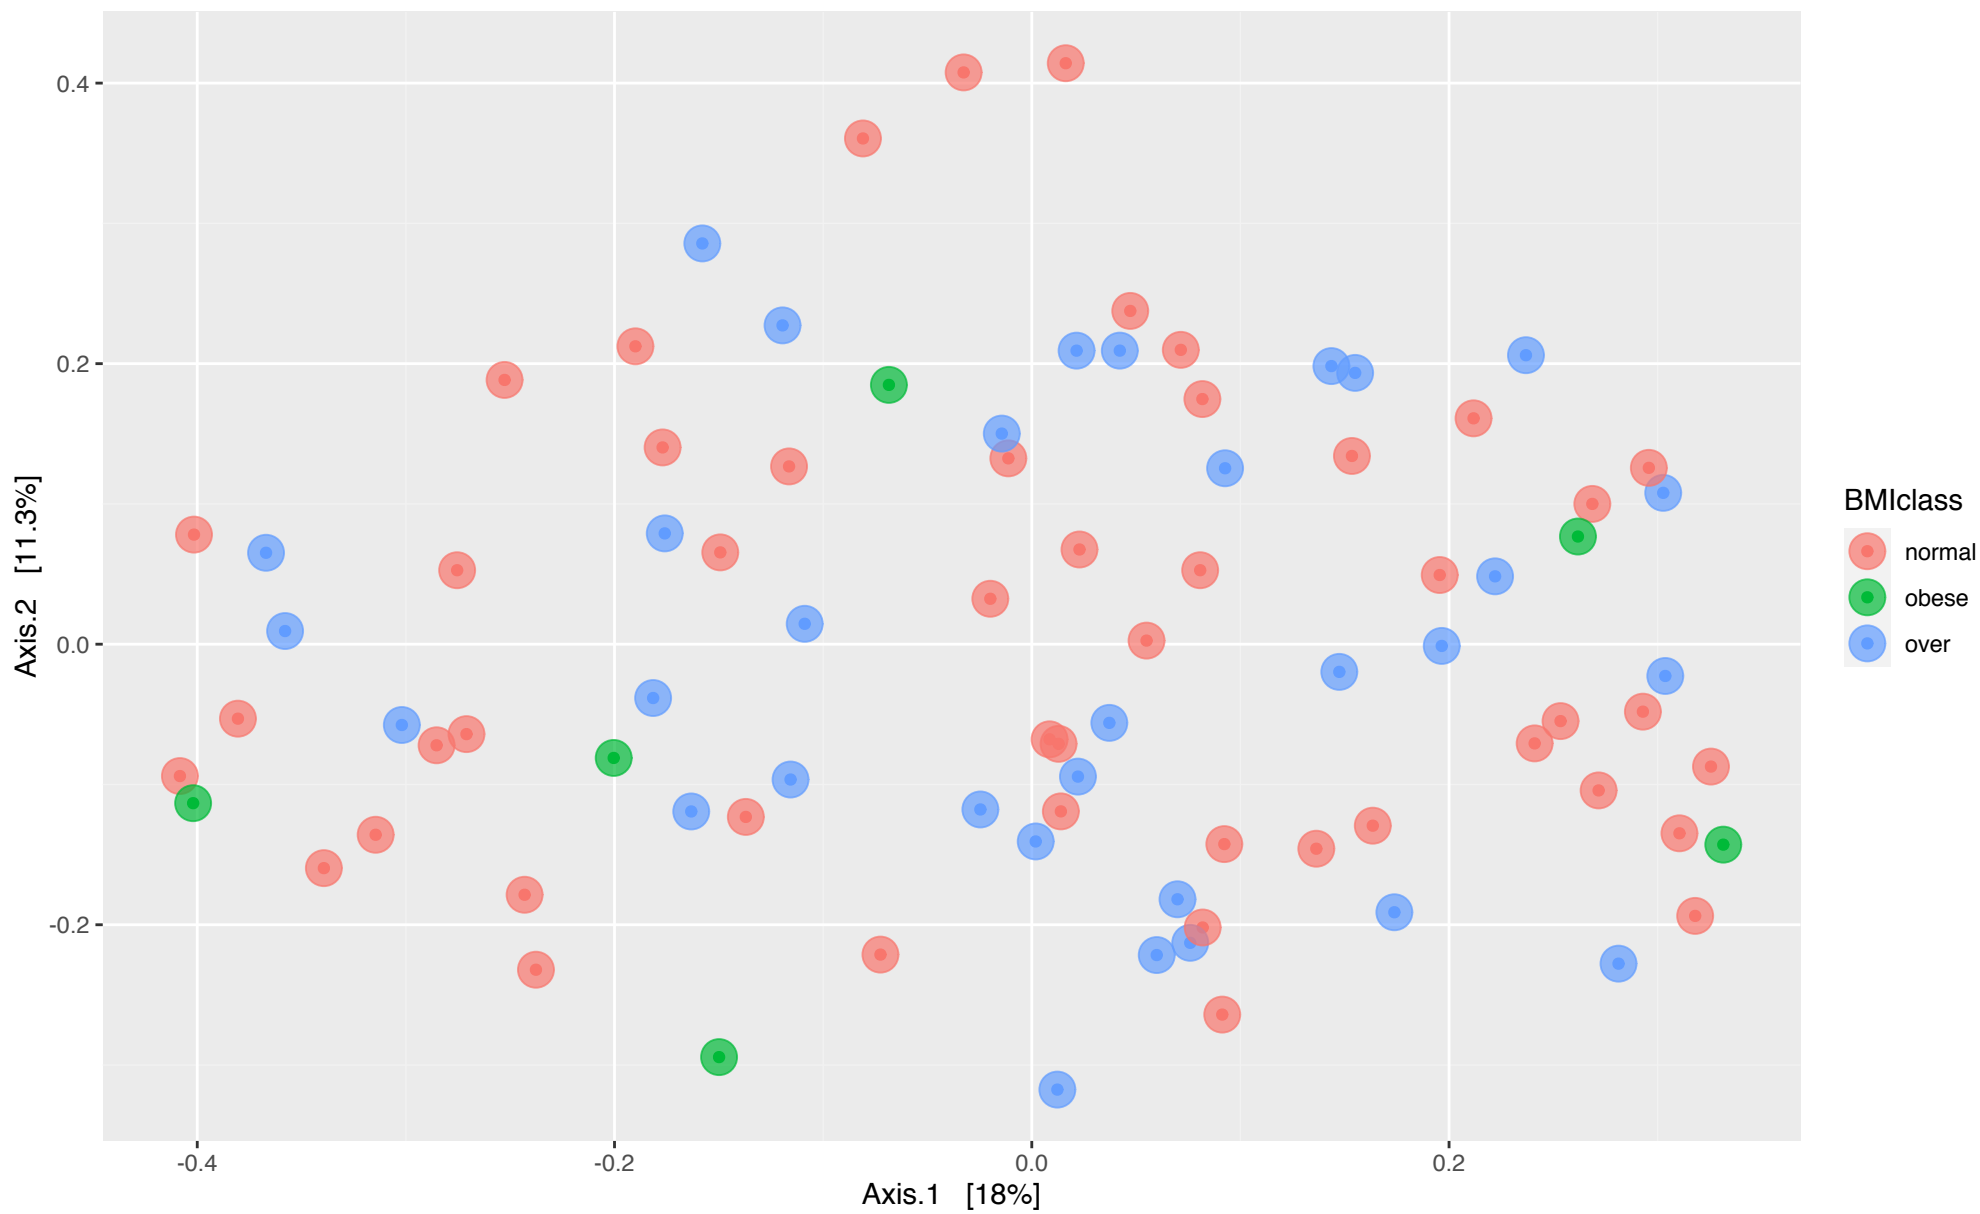

Supplement: s1 [file s1]

Figure 2 : PCoA of Bray-Curtis distance

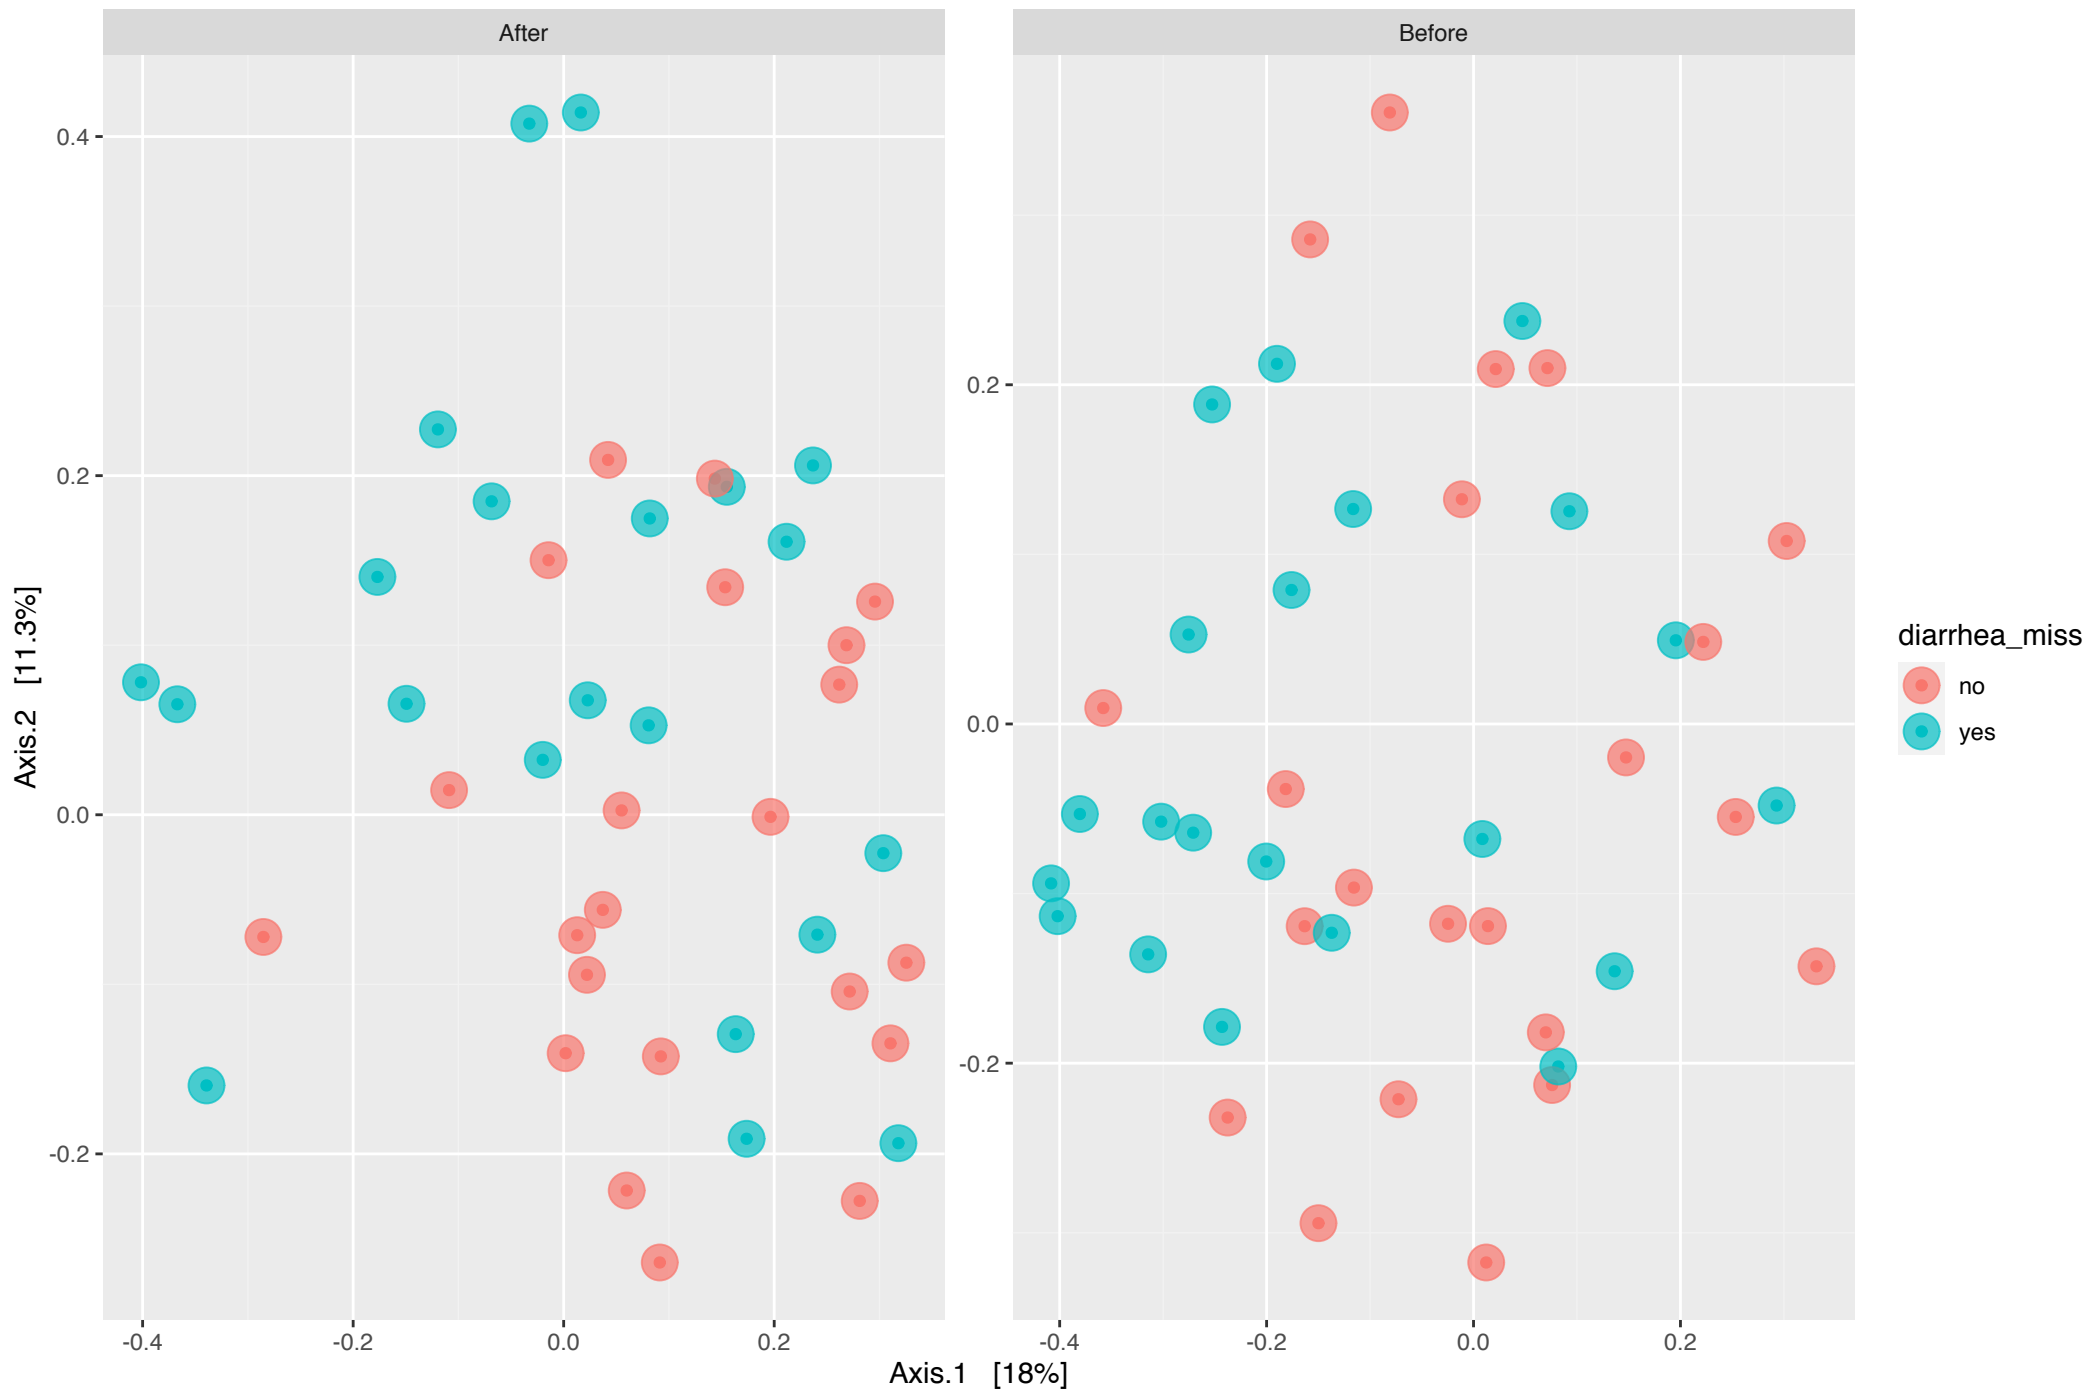

Supplement: s1 [file s1]

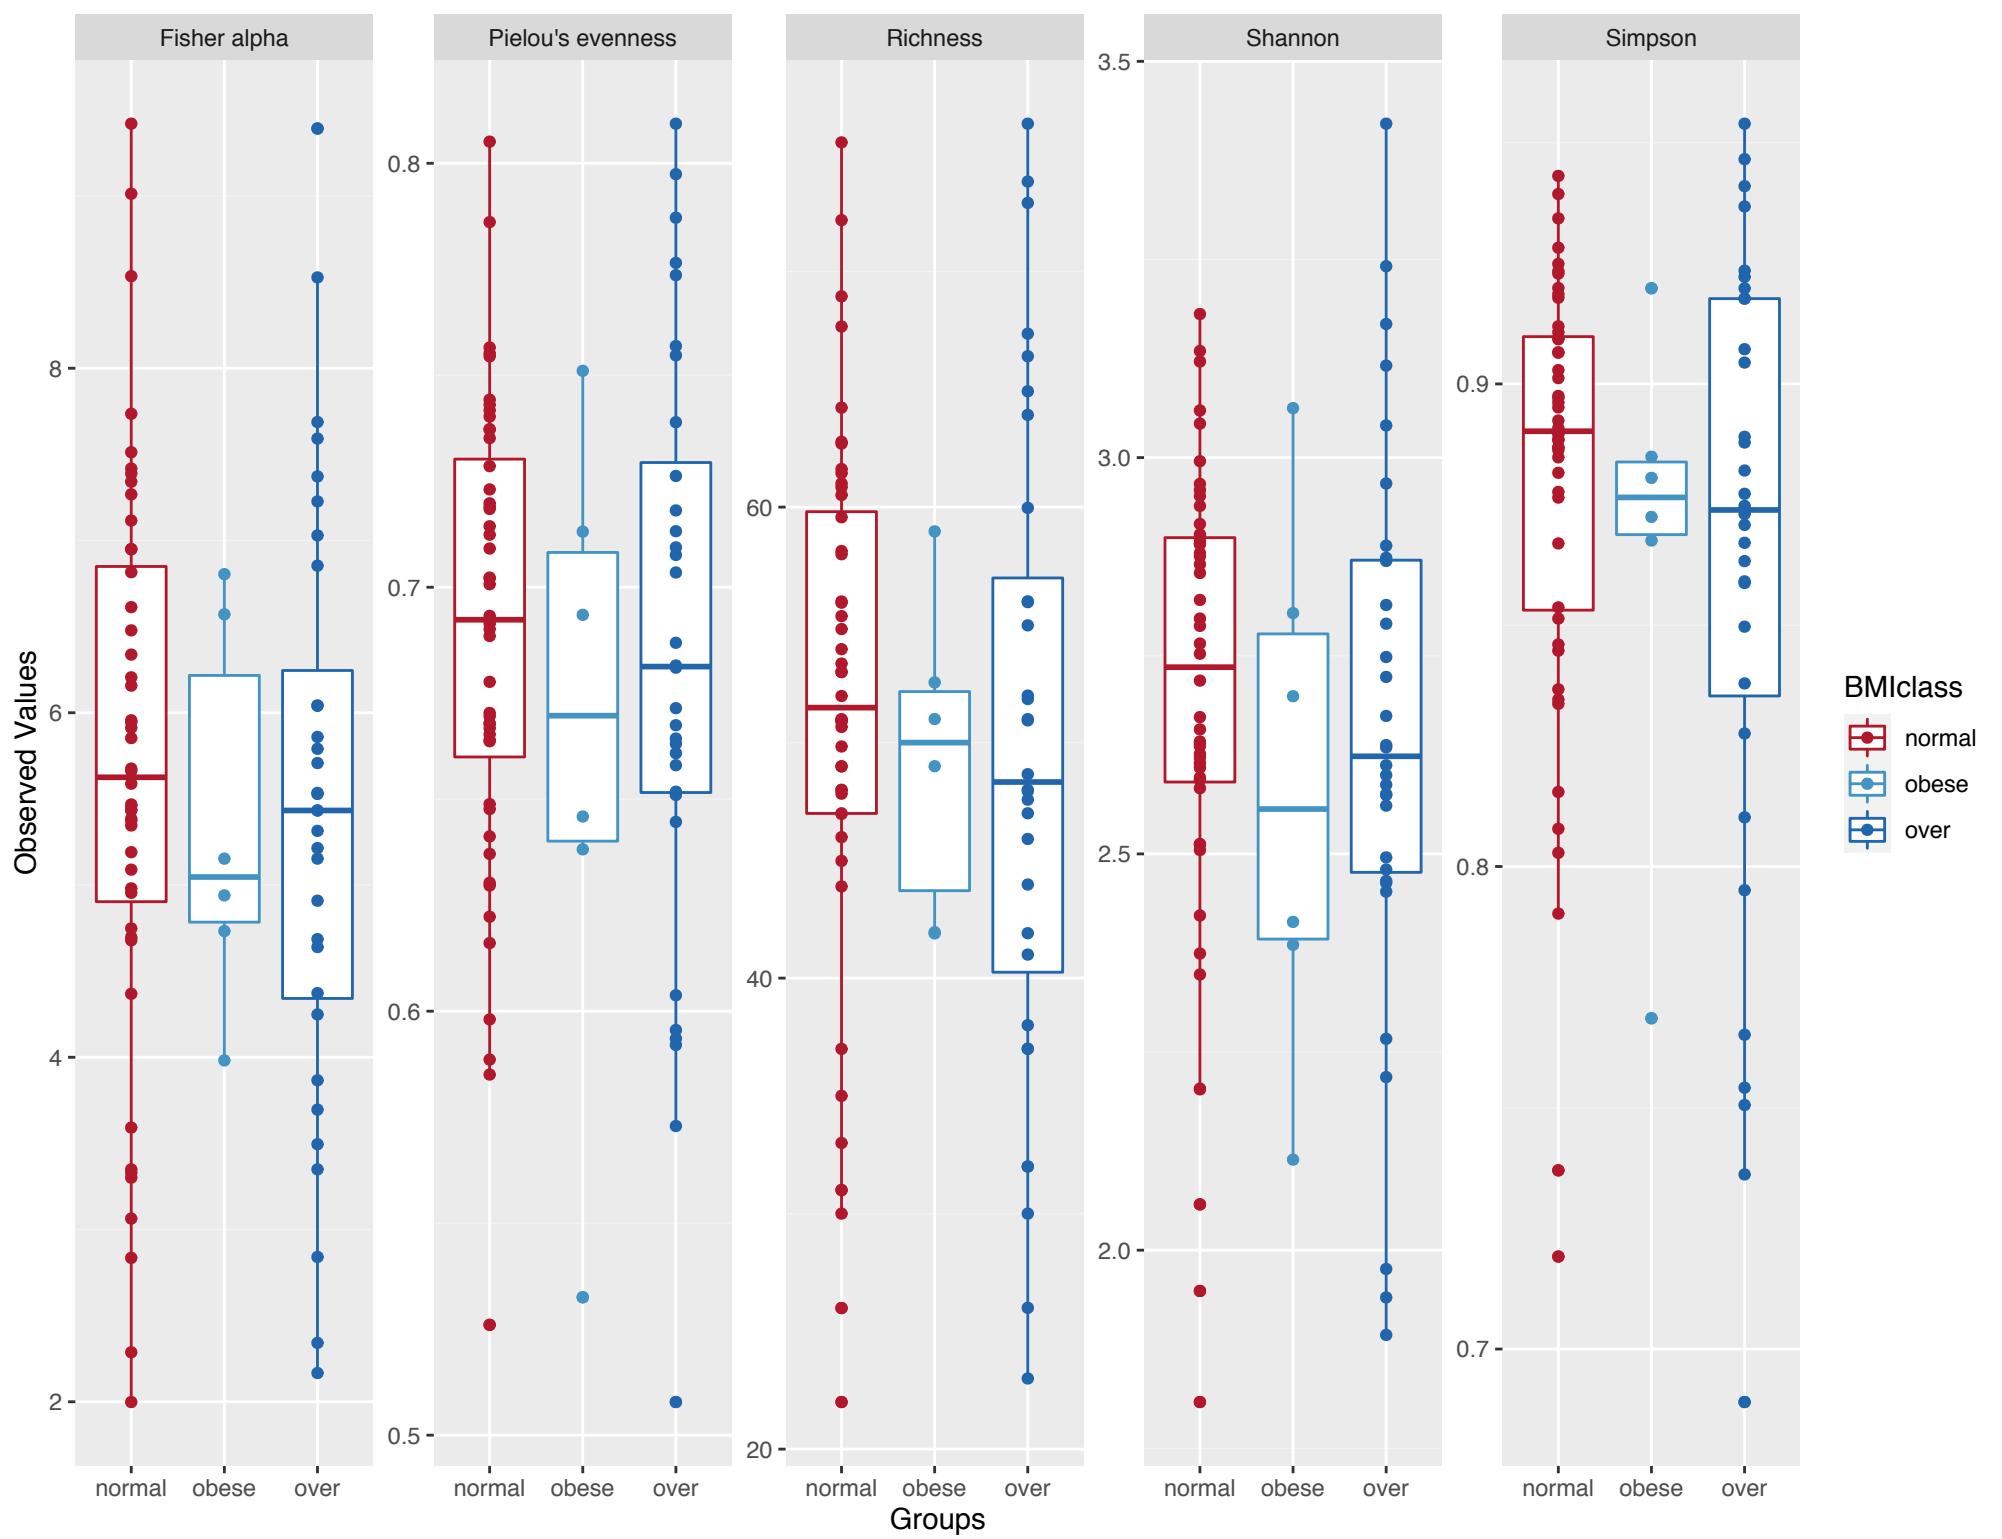

Supplement: s1 [file s1]

Bifidobacterium only by Probiotic status

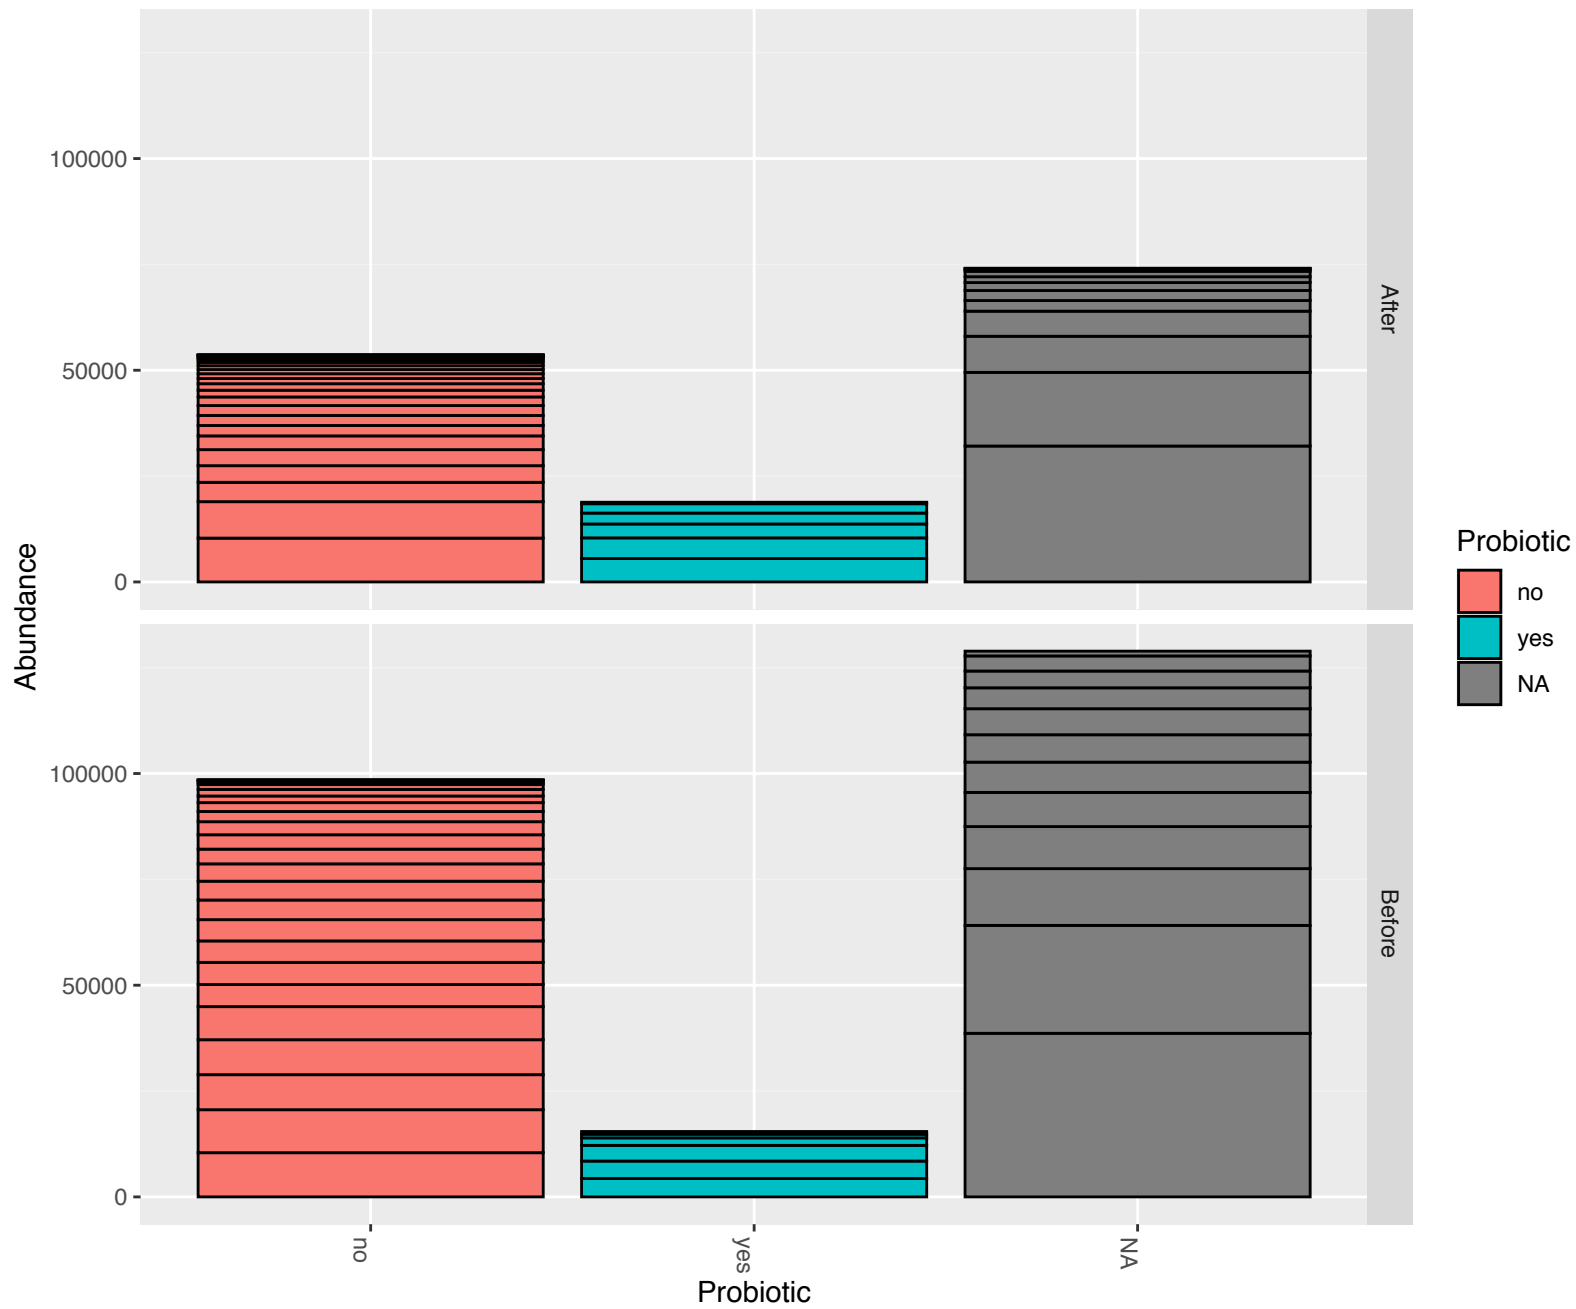

Supplement: s1 [file s1]

Composition within Proteobacteria ( 15 top Genus )

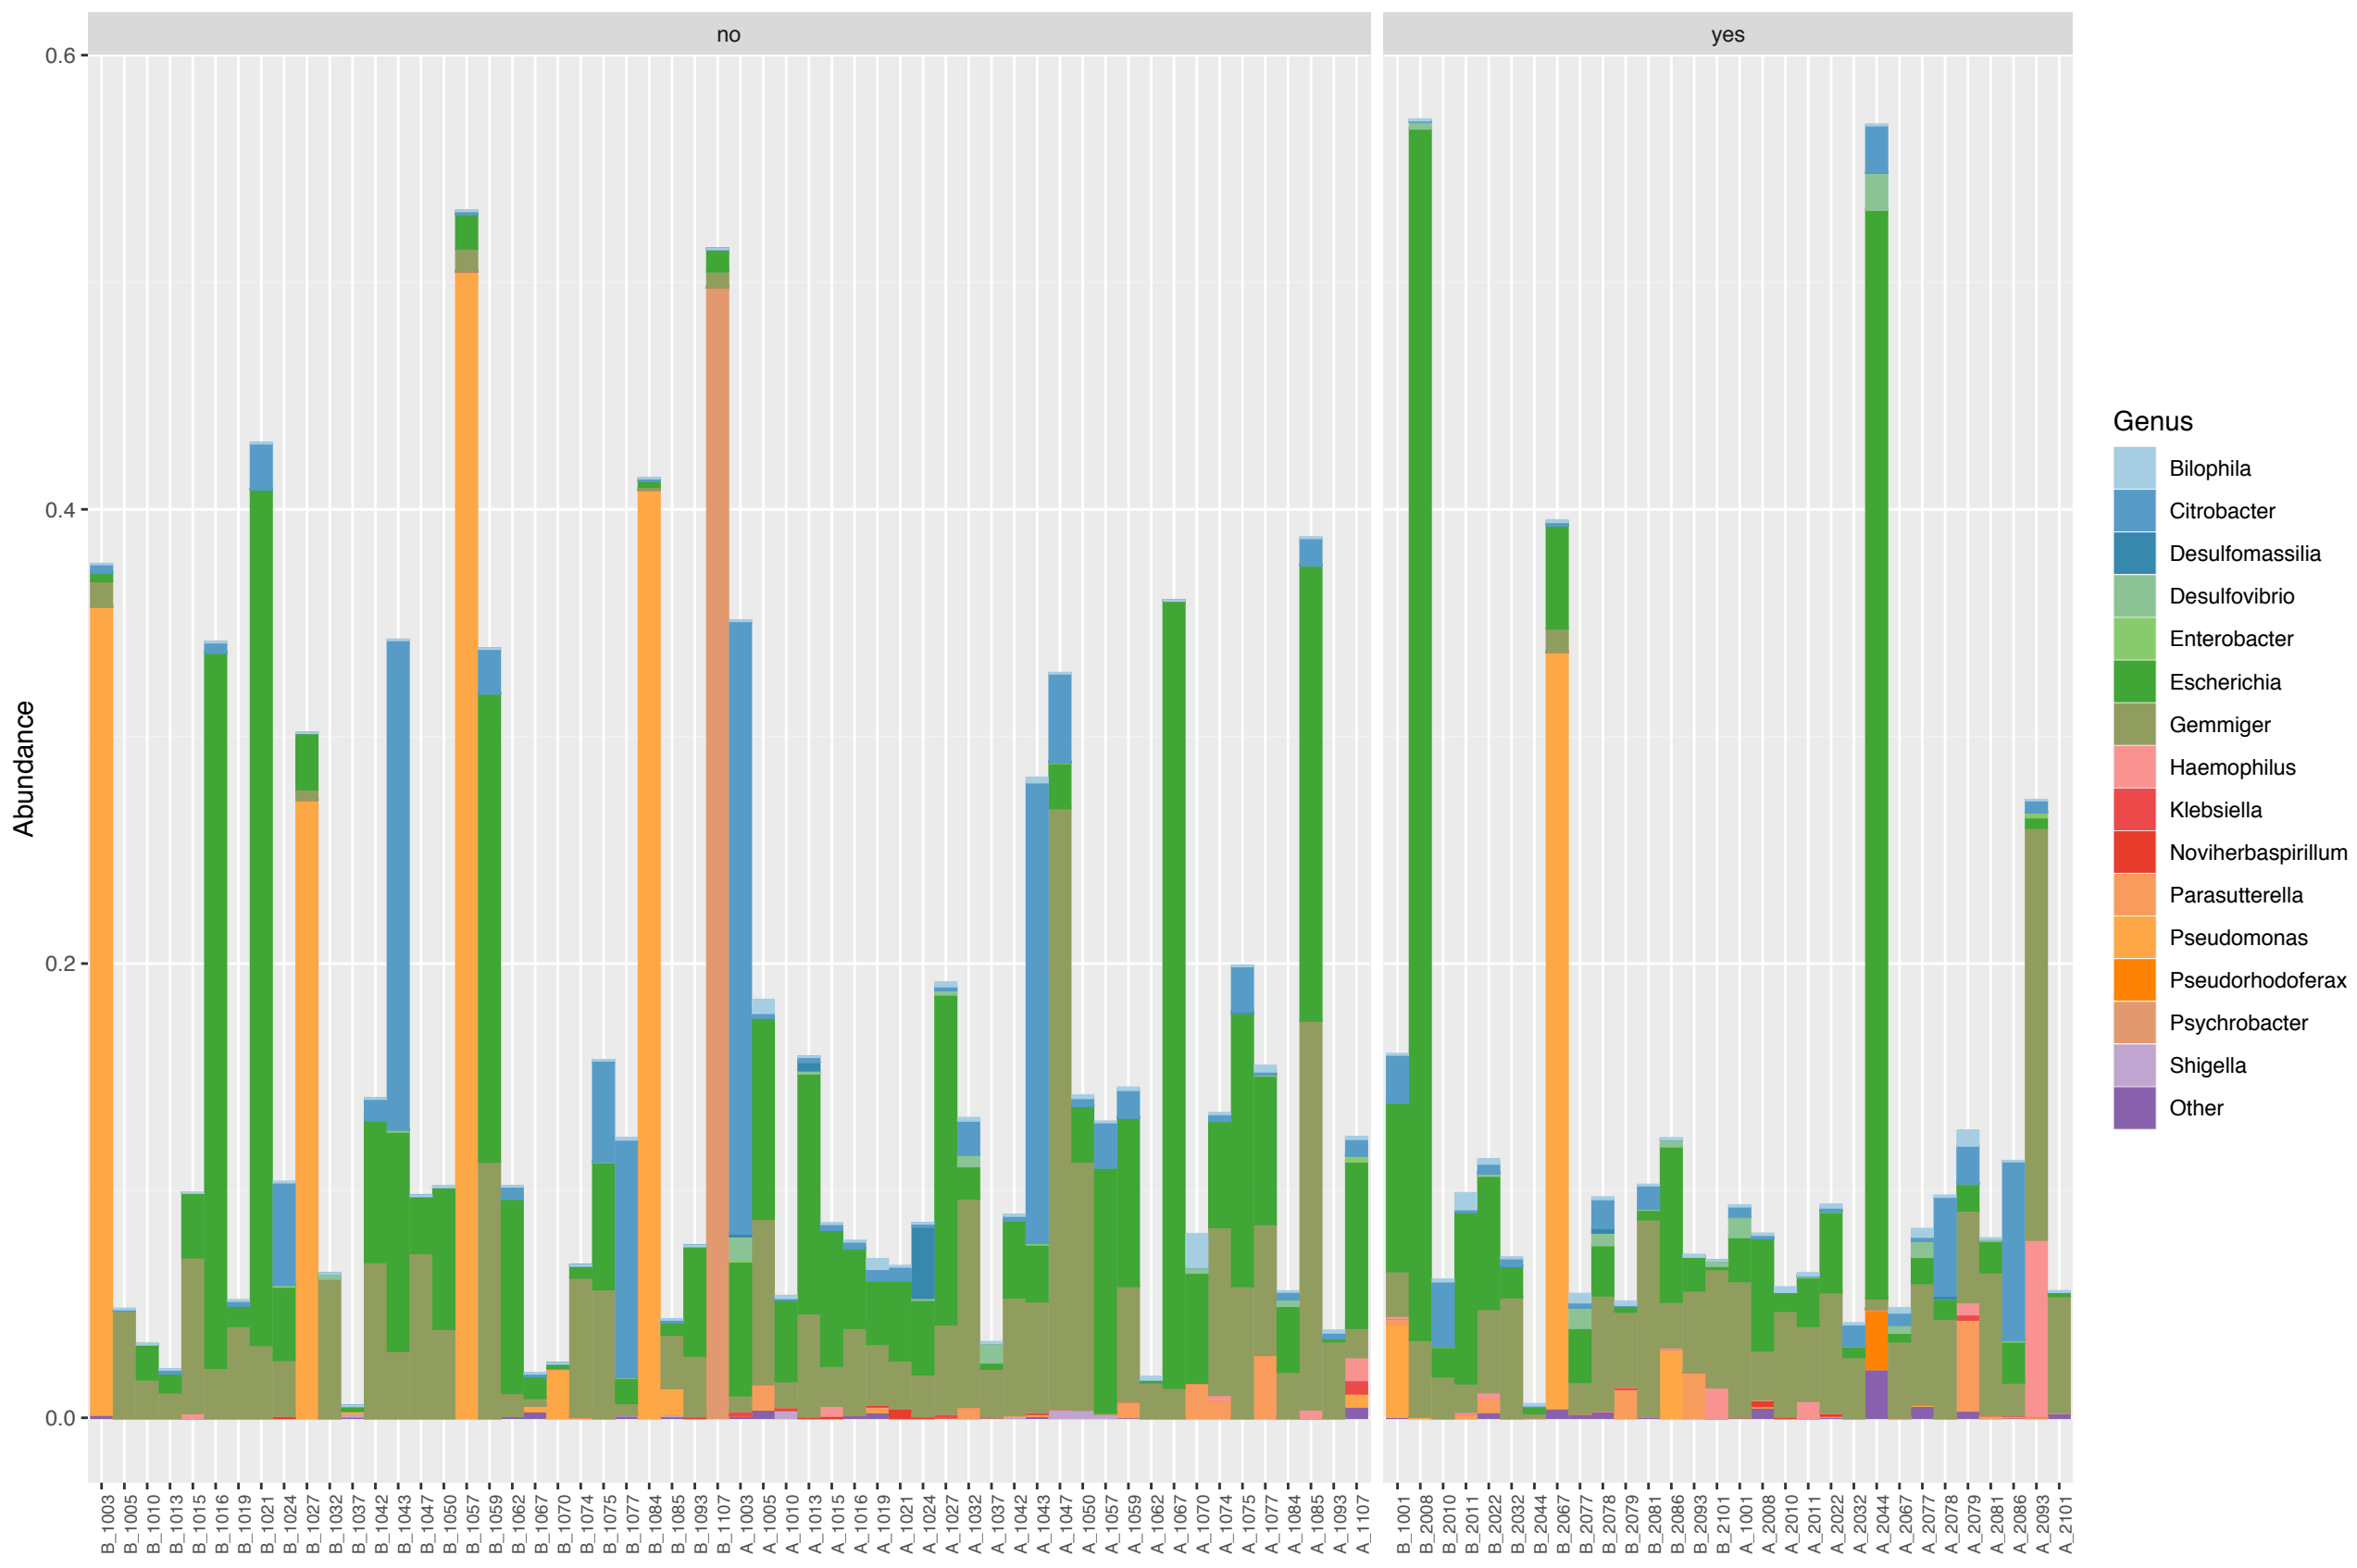

Supplement: s1 [file s1]

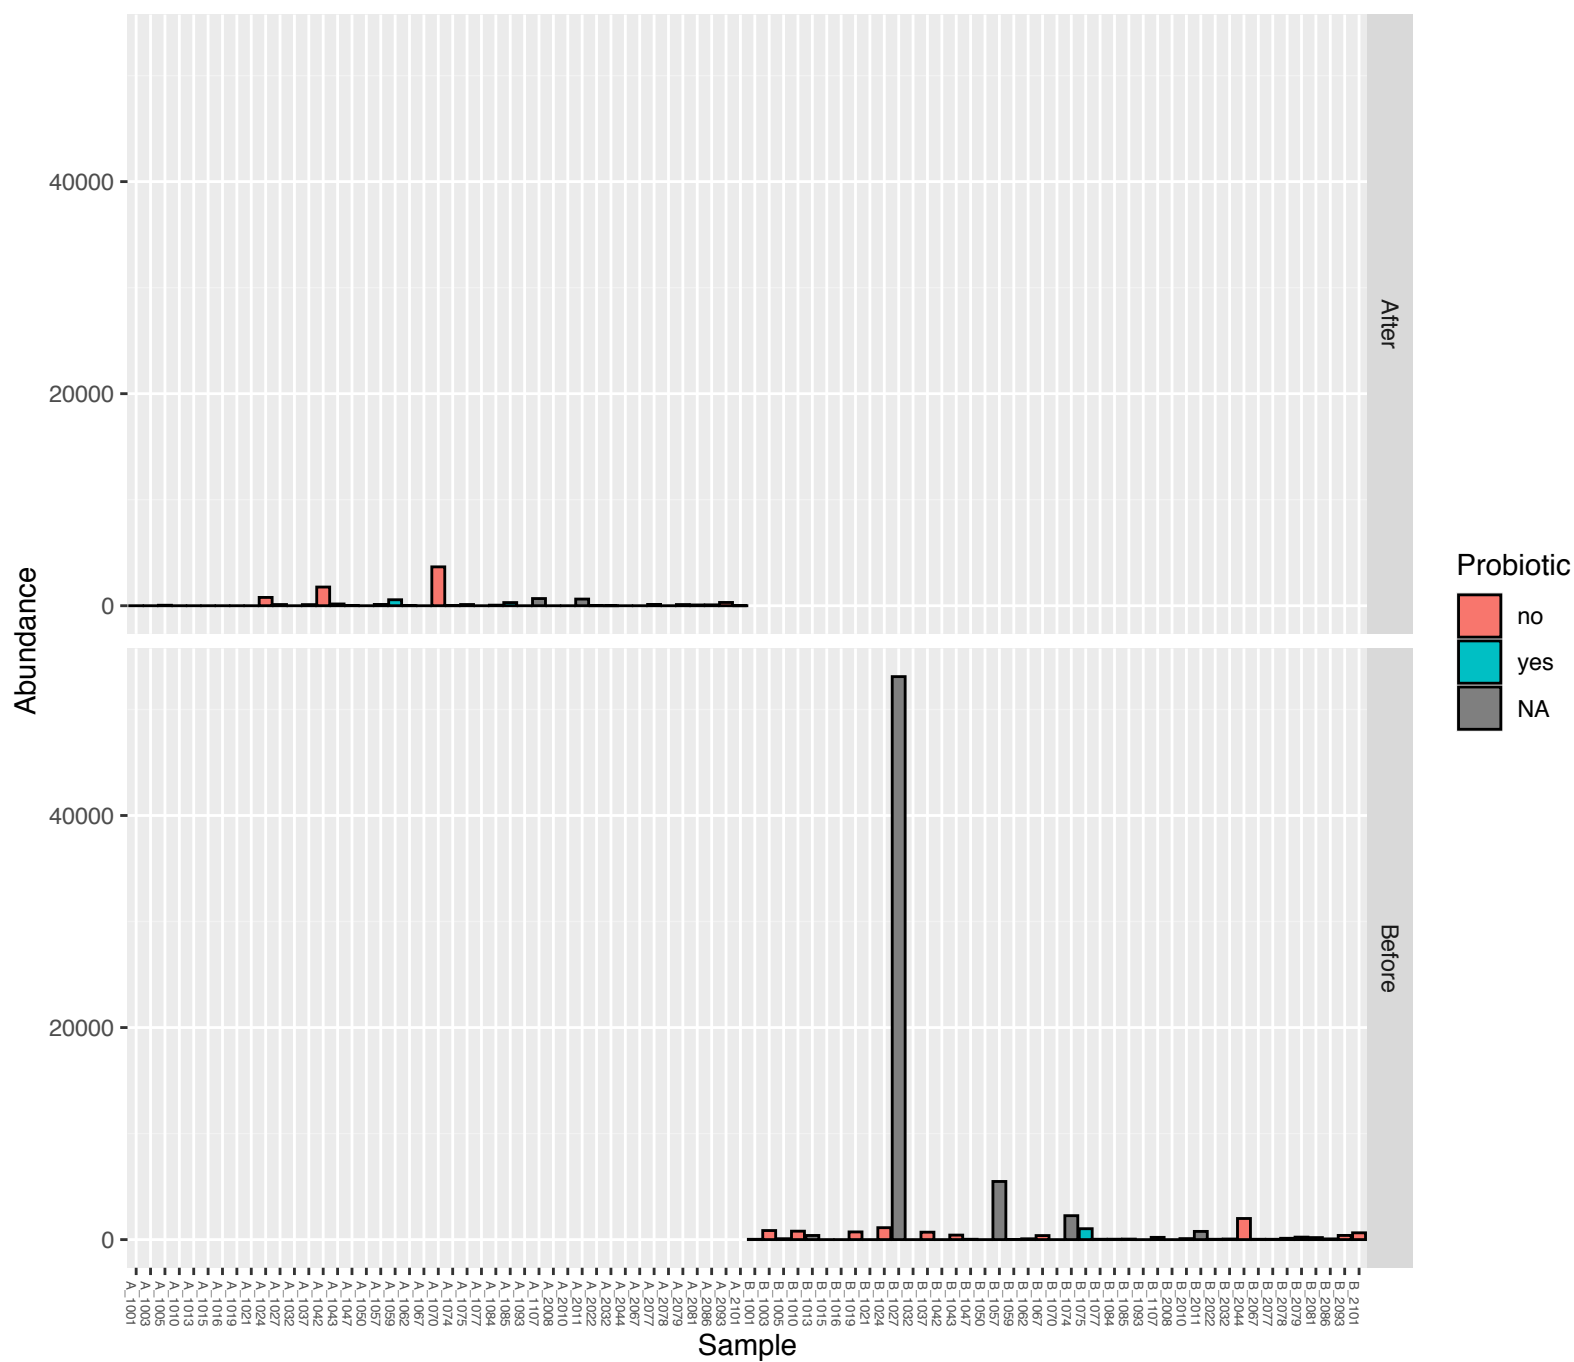

Supplement: s1 [file s1]

Figure 2 : PCoA of Bray-Curtis distance

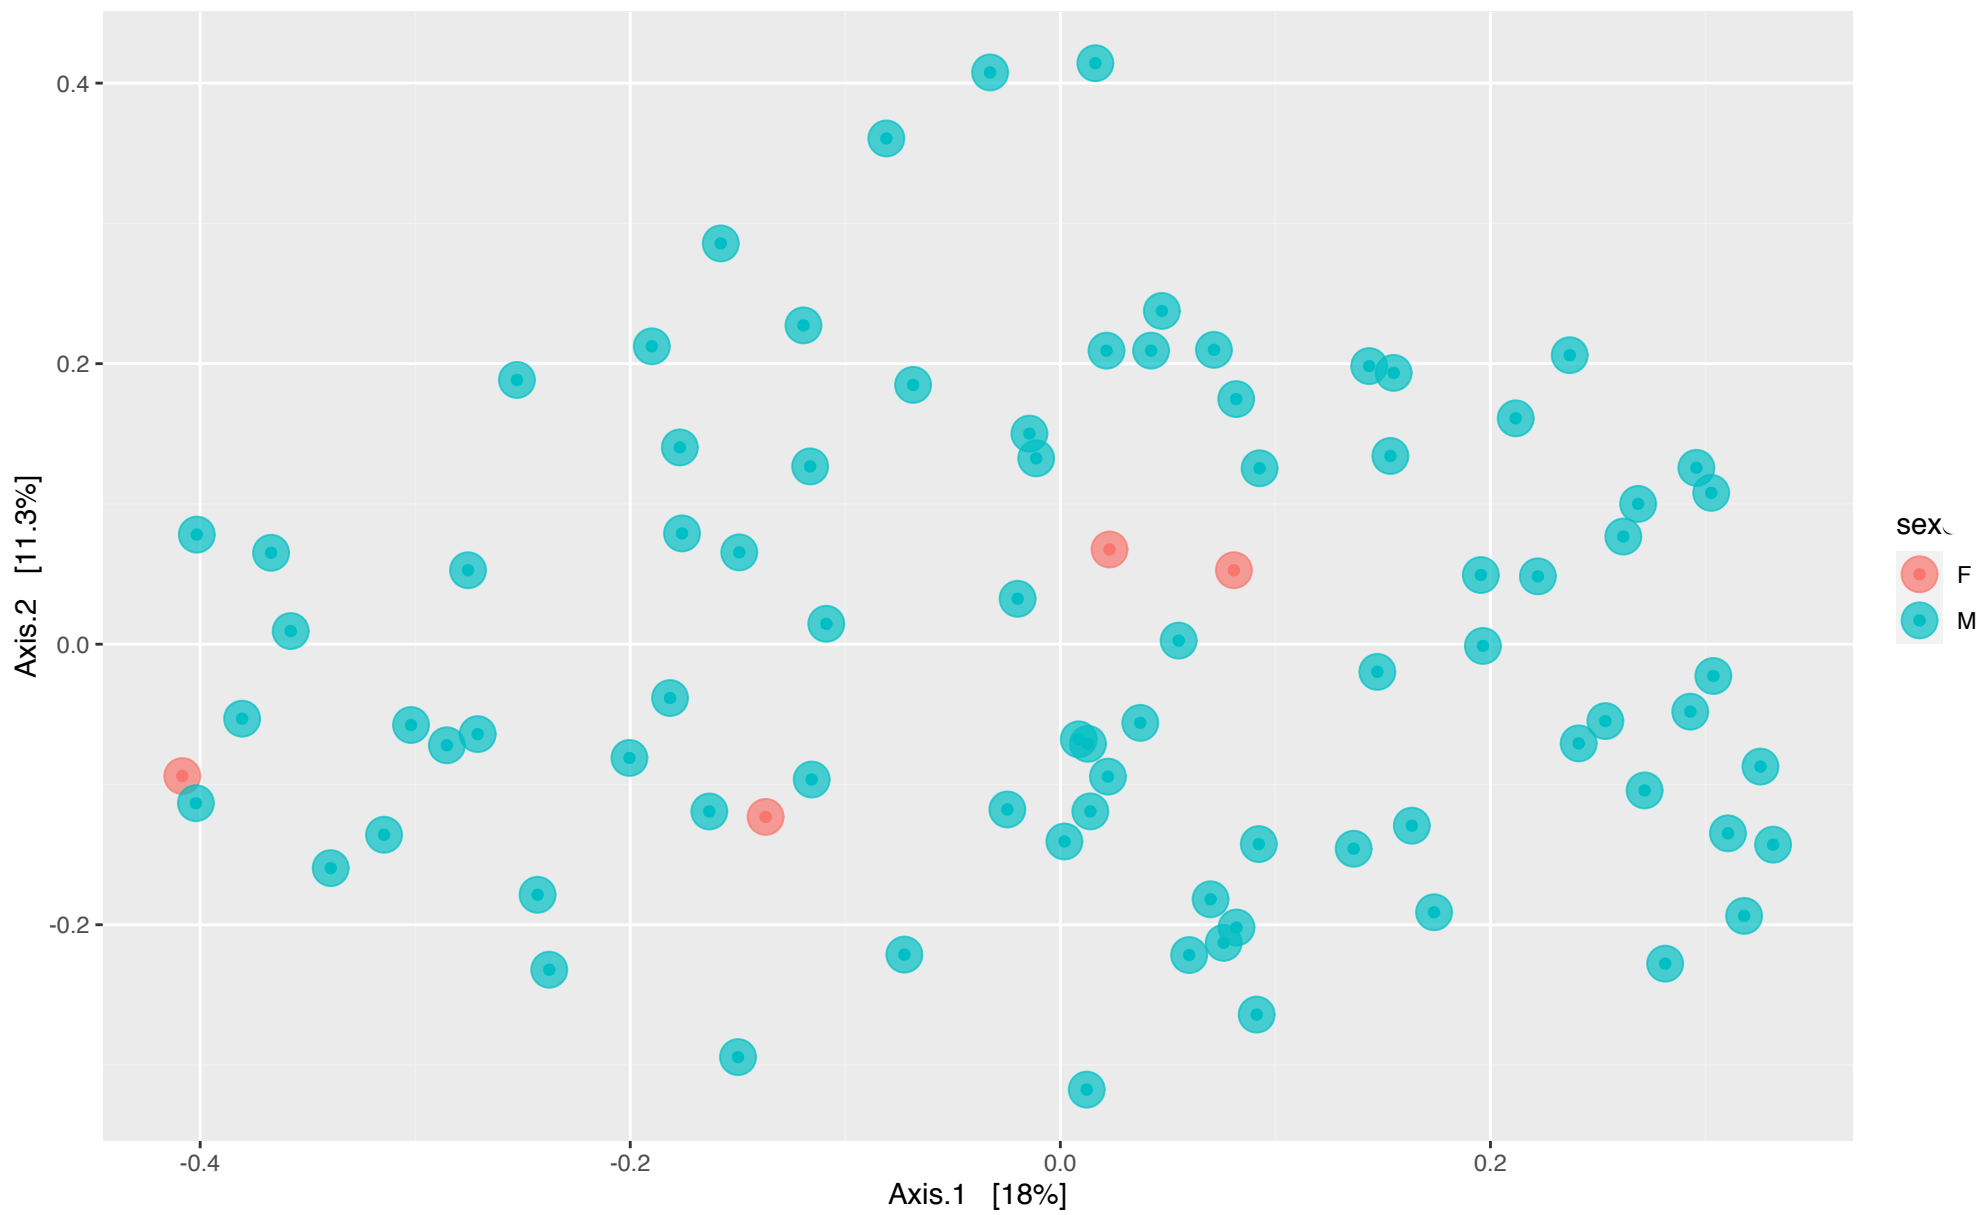

Supplement: s1 [file s1]

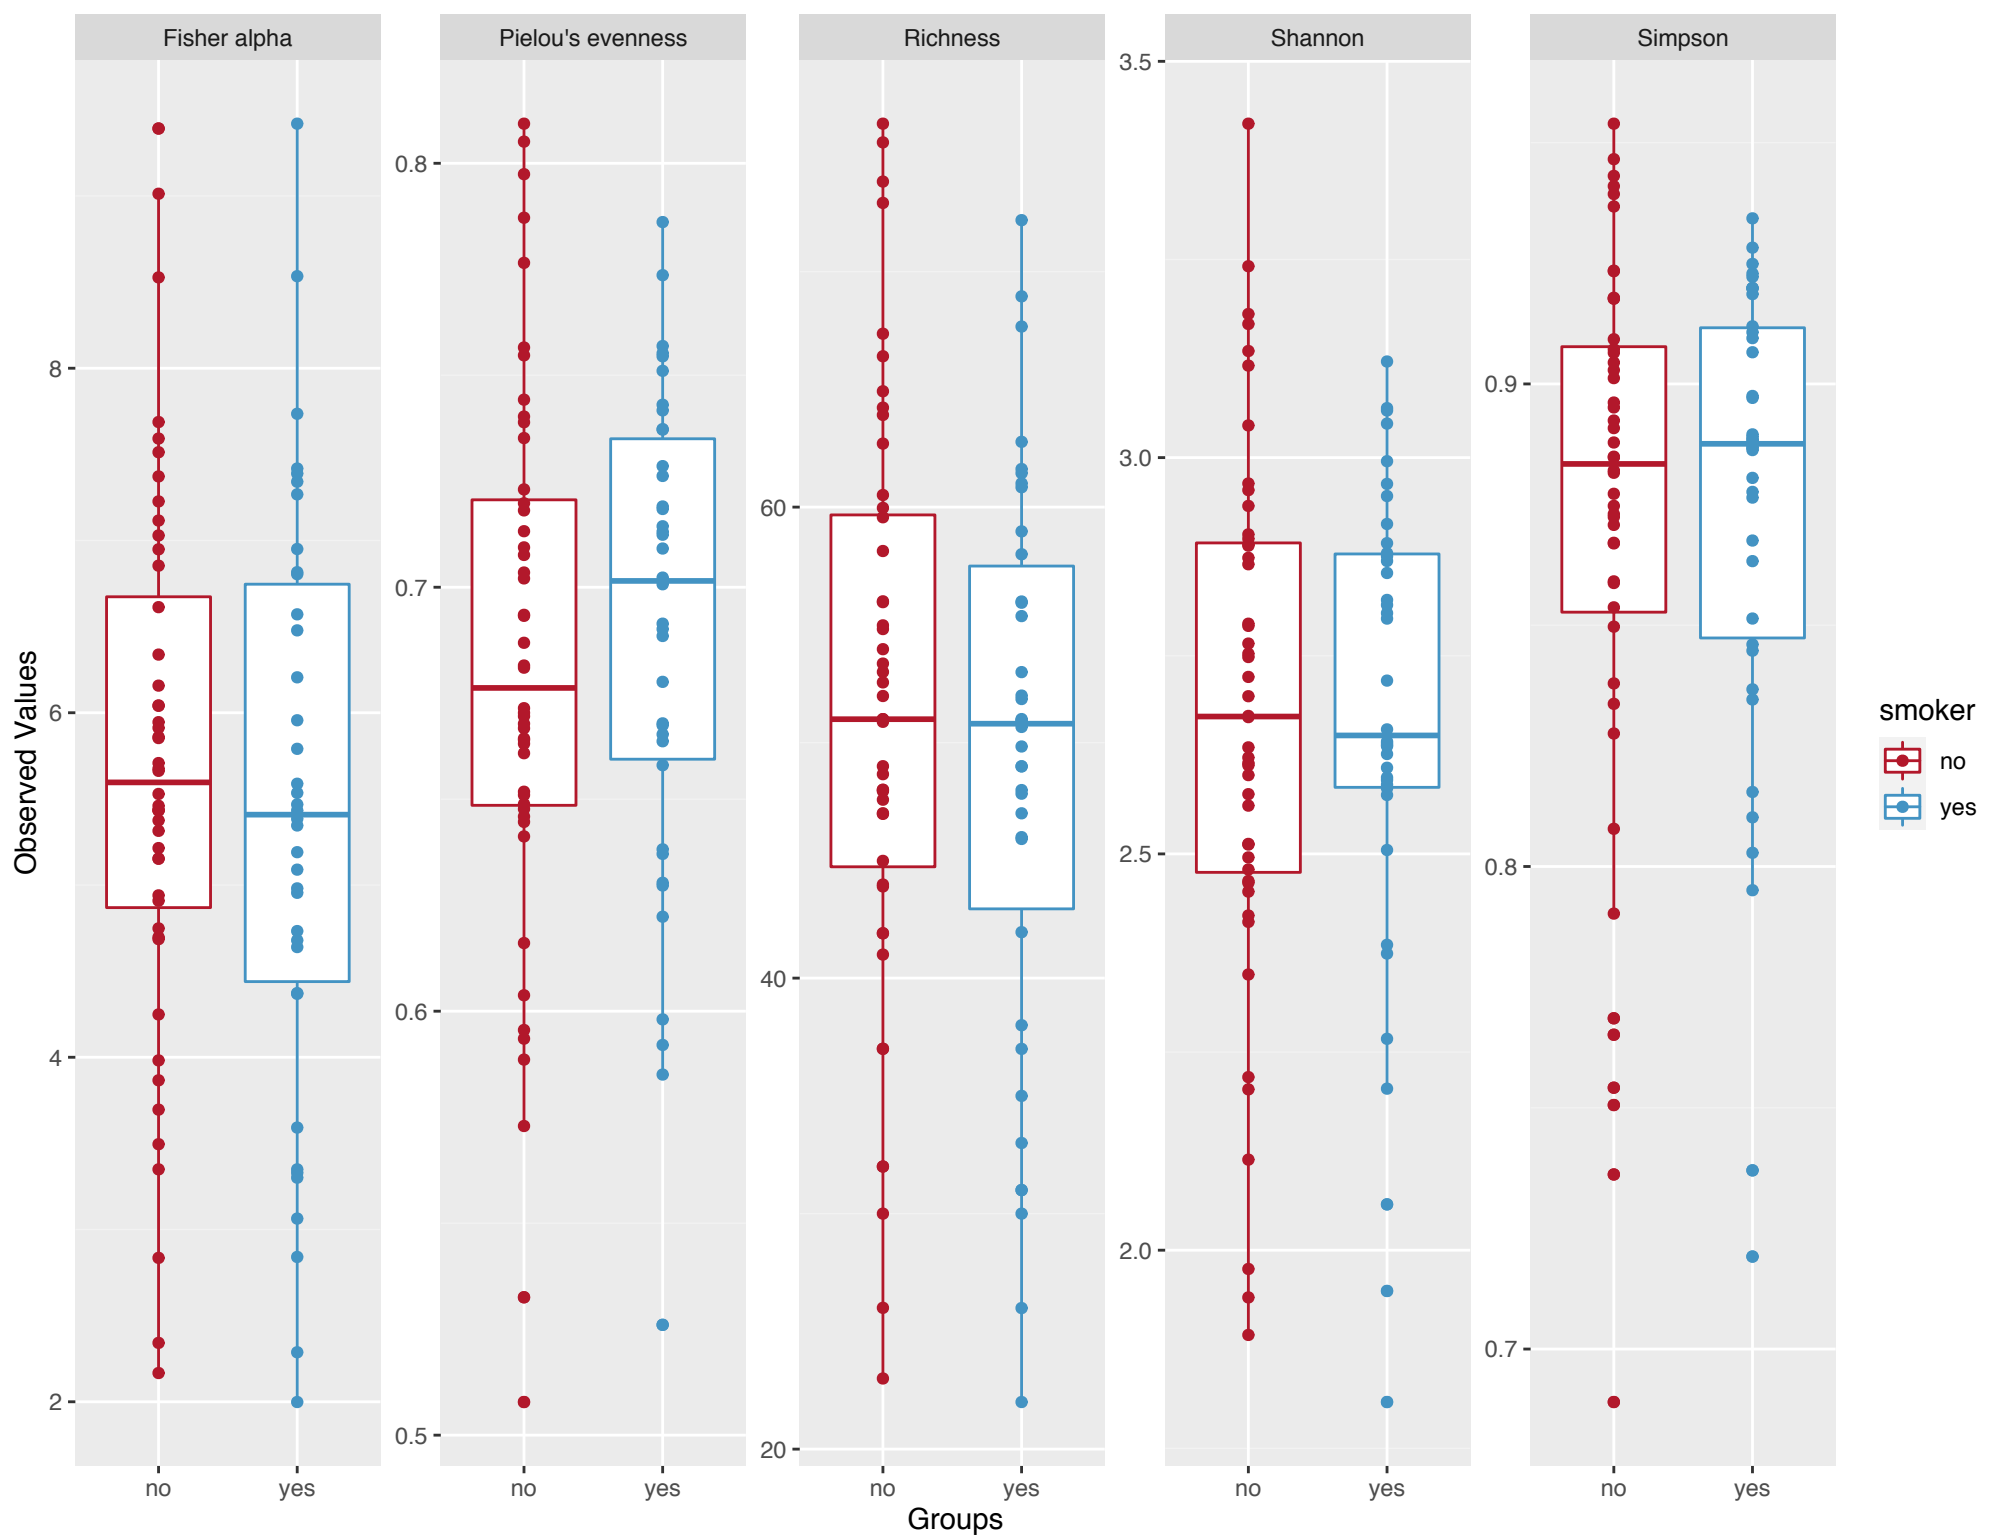

Supplement: s1 [file s1]

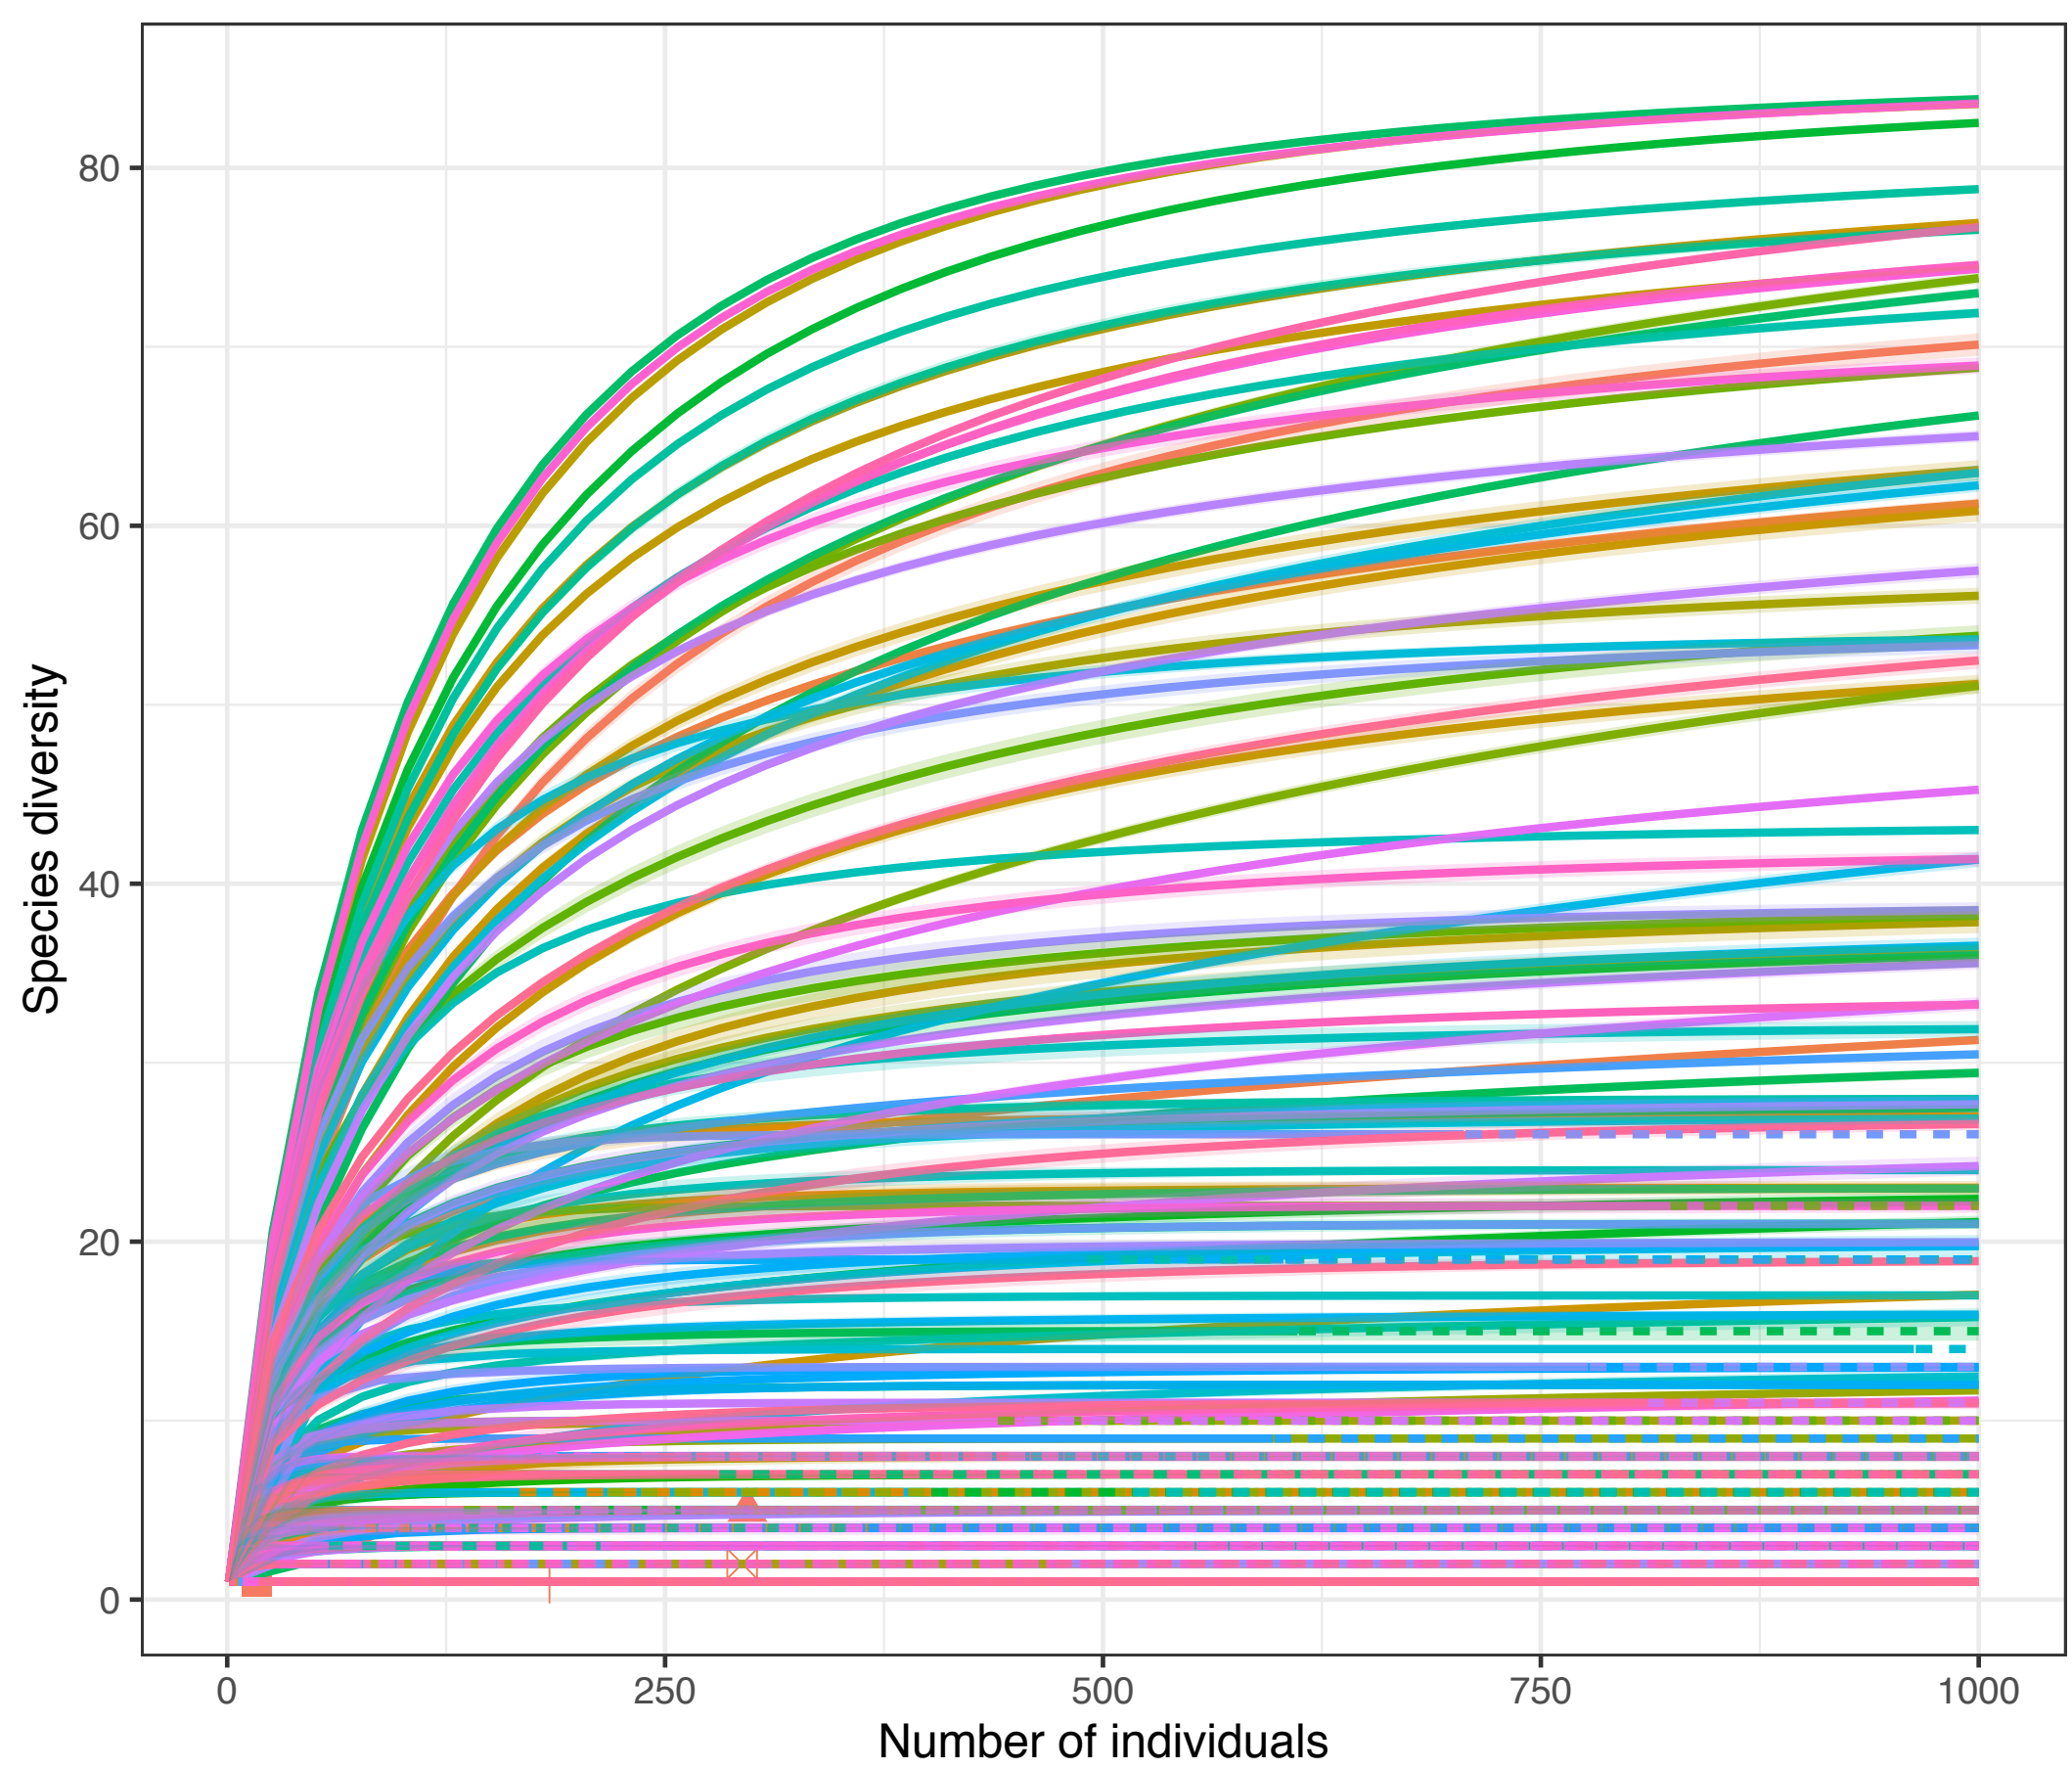

Supplement: s1 [file s1]

# Lactobacillus only

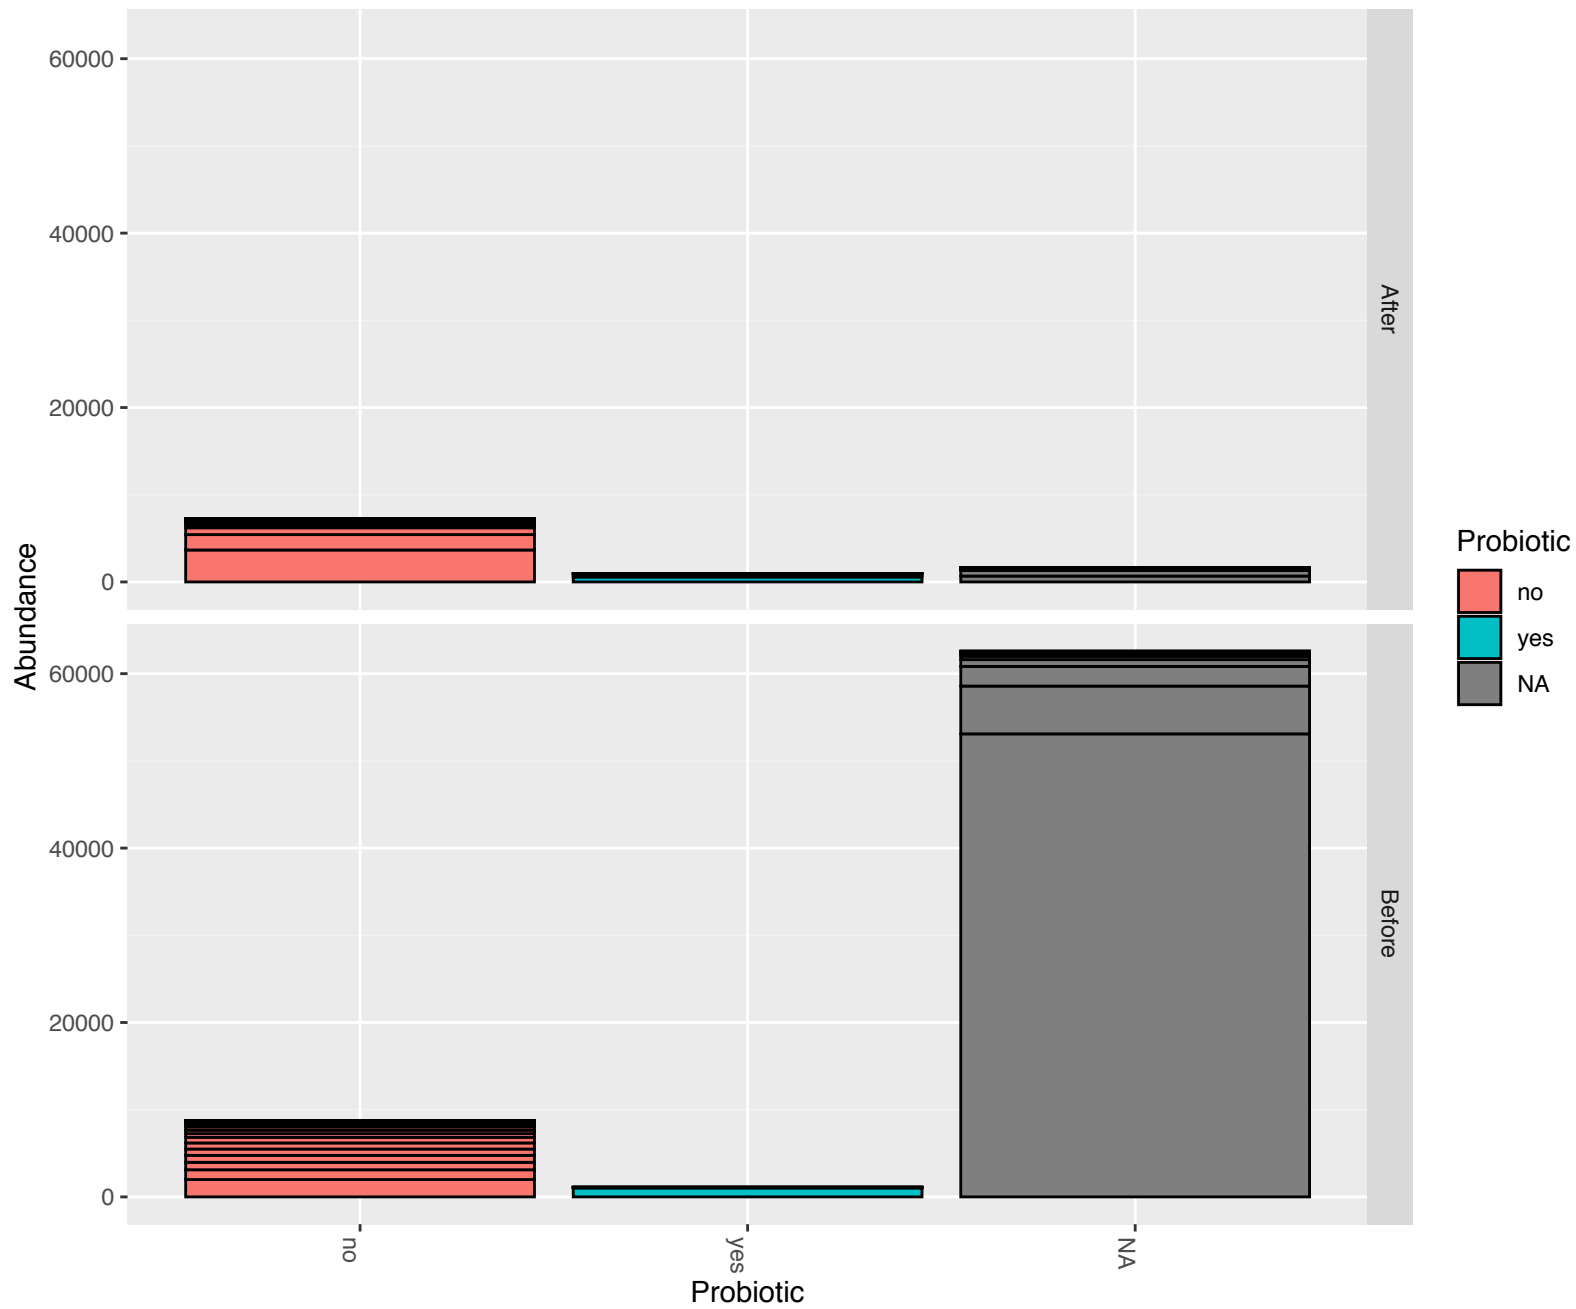

Supplement: s1 [file s1]

### Composition within Bacteroidetes ( 15 top Genus )

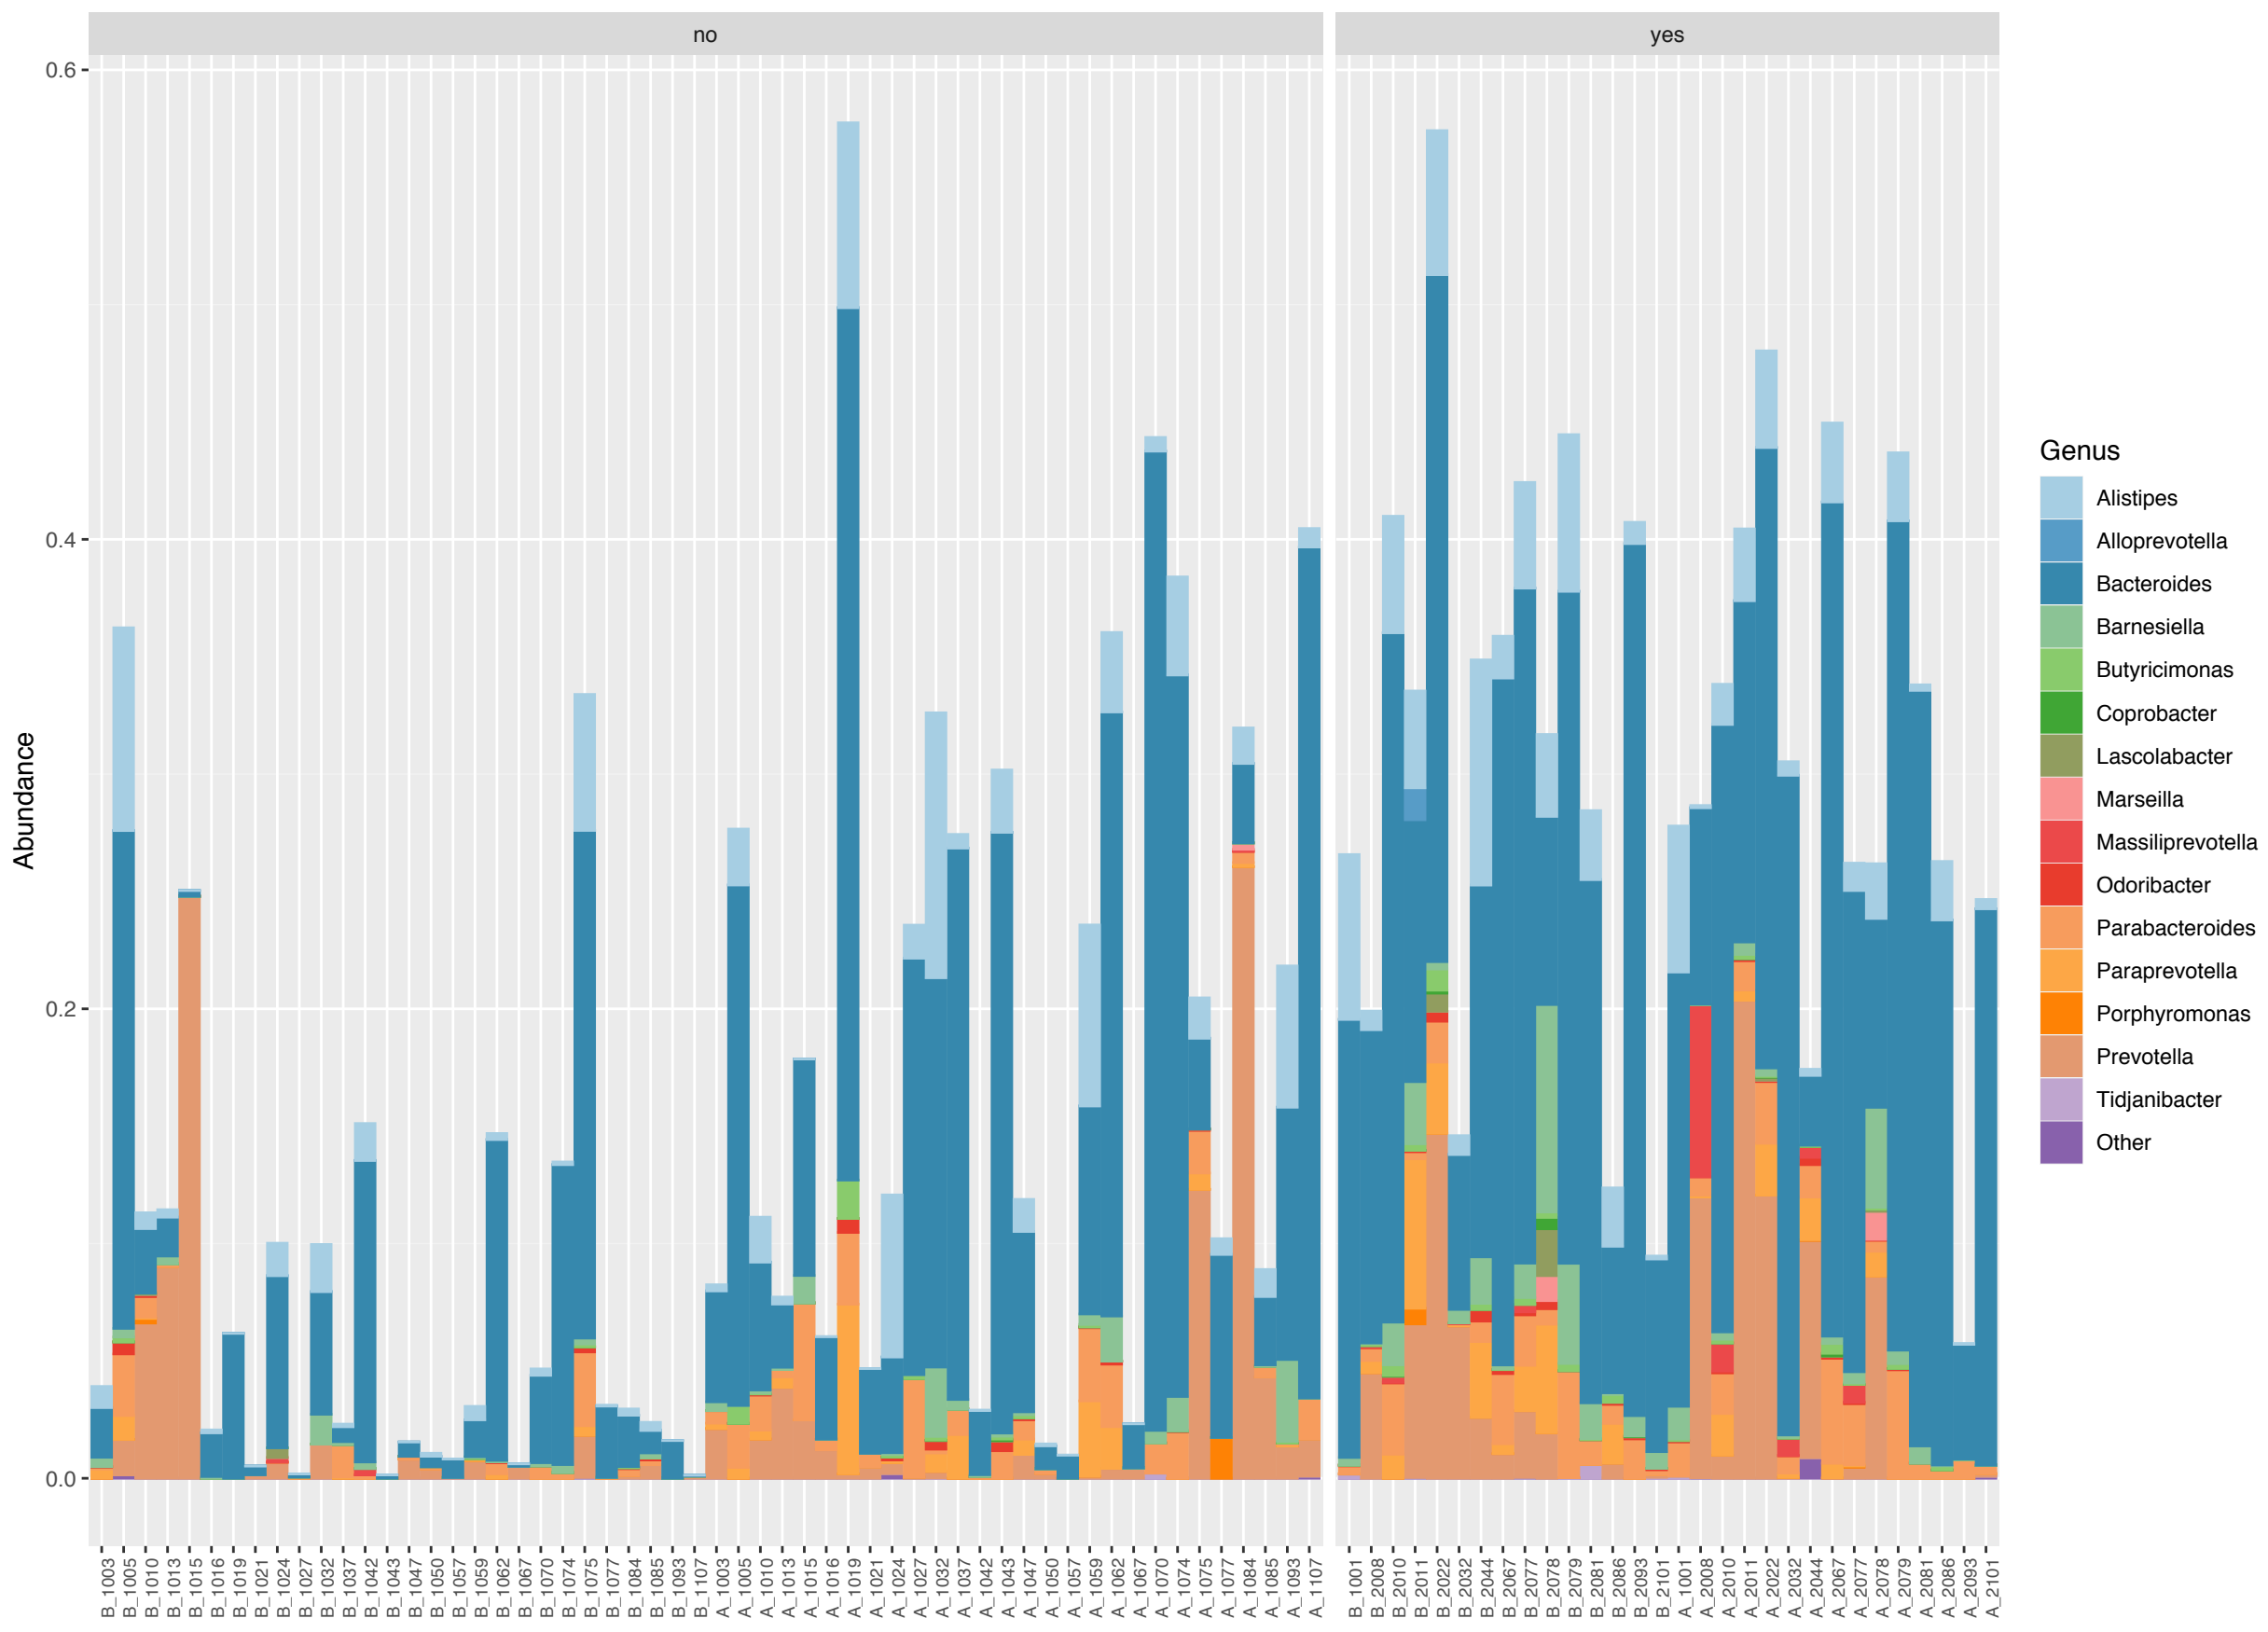

Supplement: s1 [file s1]
